## Exploring the influence of surface proteins on probiotic activity of *Lactobacillus pentosus* HC-2 in *Litopenaeus vannamei* midgut via Label-free quantitative proteomic analysis

1 Yang Du<sup>a,b</sup>, Han Fang<sup>b,c</sup>, Mei Liu<sup>a,b</sup>, Keyong Jiang<sup>a,b</sup>, Mengqiang Wang<sup>a,b</sup>, Baojie Wang<sup>a,b\*</sup>, Lei  
2 Wang<sup>a,b,d\*</sup>

3 <sup>a</sup> CAS Key Laboratory of Experimental Marine Biology, Institute of Oceanology, Chinese Academy  
4 of Sciences, 7 Nanhai Road, Qingdao, 266071, China

5 <sup>b</sup>Laboratory for Marine Biology and Biotechnology, Qingdao National Laboratory for Marine Science  
6 and Technology, Qingdao, 266237, China

7 <sup>c</sup>University of Chinese Academy of Sciences, 19 Yuquan Road, Beijing, 100049, China

8 <sup>d</sup>CAS Center for Ocean Mega-Science, Chinese Academy of Sciences, Qingdao 266400, China

9

10 \*Corresponding author: Baojie Wang

11 Email: [wangbaojie@qdio.ac.cn](mailto:wangbaojie@qdio.ac.cn).

12 \*Co-Corresponding author: Baojie Wang

13 Email: [wangbaojie@qdio.ac.cn](mailto:wangbaojie@qdio.ac.cn).

14

Corresponding/Co-Corresponding authors address: CAS Key Laboratory of Experimental Marine  
Biology, Institute of Oceanology, Chinese Academy of Sciences, 7 Nanhai Road, Qingdao, 266071,  
China

## 15 **Abstract**

16 Our previously work showed that *Lactobacillus pentosus* HC-2 as probiotic could improve the  
17 growth performance, immune response, gut bacteria diversity and disease resistance of *Litopenaeus*  
18 *vannamei*. However, the probiotic mechanism of was not fully characterized. In the present study,  
19 histology and proteomic analysis was performed to explore the influence of HC-2 surface protein on  
20 its probiotic effects to *L. vannamei* after feeding the intact surface proteins or the probiotic treated with  
21 lithium chloride (LiCl) to remove non-covalently bound surface proteins or no probiotic for four weeks.  
22 Histological observation found that feeding with normal HC-2 obviously improved the intestinal  
23 histology and enhanced the protective effect against pathogens damages, but fed with LiCl-treated HC-  
24 2 didn't improve the intestinal environment. A total over 2,764 Peptides and 1,118 uniproteins were  
25 identified from *L. vannamei* midgut, 211 proteins were significant differentially expressed normal HC-  
26 2 group compared with control, 510 proteins were significant differentially expressed in LiCl-tread  
27 HC-2 group compared with control, and 458 proteins were significant differentially expressed in LiCl-  
28 tread HC-2 group compared with normal HC-2 group. GO/KEGG enrichment analysis of the  
29 significantly different proteins demonstrated that fed with normal HC-2 mainly induced immune  
30 response, metabolic, cell adhesion and cell-cell signaling related proteins up-regulation, which were  
31 contributed to bacteria adhesion and colonization in midgut to improve shrimp immune system and  
32 growth, but these proteins were suppressed after feeding with deprived surface proteins bacteria. Taken  
33 together, these results indicating that the surface proteins were indispensable for HC-2 to execute  
34 probiotic effects in midgut of shrimp.

35 **Key words:** *Litopenaeus vannamei*; *Lactobacillus pentosus* HC-2; Surface proteins; Proteomic  
36 analysis.

## 37 Introduction

38 *Litopenaeus vannamei*, is one of the most valuable crustacean aquaculture species worldwide  
39 because of its high nutrition value and tolerance to extensive salinity [1]. However,  
40 water environment deterioration, frequent disease outbreaks caused by viruses such as WSSV, YHV  
41 and IHHNV, or by bacteria like genus *Vibrio* are more prominent issues as a consequence of the rapidly  
42 growing shrimp aquaculture industry [2, 3]. Thus, there is international concern about dealing with the  
43 tough problem by supplying probiotic bacterial cells in food or in the aquatic environment to control  
44 the infectious diseases by strengthening the physique of aquatic animals [4, 5]. Among the available  
45 probiotics, lactic acid bacteria (LAB) are commonly used and advocated, such as *Lactobacillus*  
46 *pentosus*, *Lactobacillus helveticus*, *Lactobacillus delbrueckii*, *Lactobacillus acidophilus* and  
47 *Lactobacillus plantarum* have been widely administered for the significant of improving host immune  
48 status, strengthening the host digestion, modulating the bacterial community, and antagonizing  
49 opportunistic pathogens [6-8].

50 The mechanisms of probiotic functionality LAB are not completely understood, but it is believed  
51 that the maximum probiotic effects can be achieved if the organisms adhere to mucus and/or intestinal  
52 epithelial cells [9]. It has recently suggested that surface proteins of lactobacilli bacteria participate in  
53 adhesion to epithelial cell lines, gastrointestinal mucins, or extracellular matrix proteins [10-12].  
54 Indeed, except mediating binding ability, surface proteins are also involved in maintaining the shape  
55 of the bacteria, molecular sieve function, immunomodulation to the host, and providing extracellular  
56 enzyme binding sites [13-15]. Due to these proteins bind to the outermost layer of the bacteria with  
57 non-covalent bonds, make it possible that using denaturants lithium chloride (LiCl), guanidine  
58 hydrochloride (GuHCl), urea or metal chelating agents etc depolymerize them to monomer [16-18].

59 In previous work, we isolated a *Lactobacillus pentosus* HC-2 strain which has high antimicrobial  
60 activity against *Vibrio* pathogens and adhesive ability to intestinal mucosa, and regulated intestinal  
61 flora, and enhanced the growth performance, immune responses, and disease resistance after the *L.*  
62 *vannamei* fed with it [19-21]. The present study aim to further investigate the mediate function of  
63 surface proteins of *L. pentosus* HC-2 in the process of colonization and immune regulation of HC-2 to  
64 *L. vannamei*, label-free proteomic analysis was applied to characterize the proteins expression induced  
65 by surface proteins in midgut of shrimp fed with LiCl-treated HC-2.

## 66 **Materials and methods**

### 67 **Bacterial growth and surface proteins shaving**

68 *Lactobacillus pentosus* HC-2 (GenBank Accession No. KU995298) was previously isolated  
69 from the intestinal tract of fish (*Acanthogobius hasta*) by our laboratory [21], which was saved in - 80  
70 °C in de Man, Rogosa, and Sharpe (MRS) broth containing 20% (v/v) glycerol. After the recovery, the  
71 bacteria were cultured unstirred in MRS medium at 37 °C under anaerobic conditions.

72 Cell surface proteins shaving performed as previously [22]. Briefly, 500-mL culture of bacteria  
73 on the transition between late exponential and stationary phase (OD600  $\approx$ 1.7) were harvested  
74 centrifugation (3,000  $\times$  g, 10 min, 4 °C). Then, the cell pellets were washed three times with 1  
75 M phosphate-buffered saline (PBS) containing 25% sucrose. After centrifugation, the bacteria cells  
76 were incubating the cells in 25ml of 5 M LiCl to stripe the surface associated proteins. After treatments,  
77 cells were collected and washed three times with autoclave sterilized seawater.

### 78 **Feeding trials**

79 The experimental diets were prepared as previously that bacteria were resuspended in sterilized

80 seawater and sprayed on basal commercial feed (containing crude protein 42%, crude fat 7%, ash 15%,  
81 and water 11%) at  $5 \times 10^8$  colony-forming units (CFU) g/feed [22]. A total of 600 shrimps ( $3.5 \pm 0.06$   
82 g) were grown in twelve aquaria (60 L), each containing 50 shrimp. The experiments were designed  
83 as follows: C group, shrimp fed a basal commercial diet alone as the control; R group, shrimp fed a  
84 basal commercial diet + normal HC-2; L group, shrimp fed a basal commercial diet + LiCl treated HC-  
85 2. Three replicates were set in each feeding group. Keeping the fresh seawater (salinity, 30‰) at  $30 \pm$   
86  $2$  °C with continuous aeration and a 50% water change every day. Animals were fed three times per  
87 day, and the daily feeding rate was 10% of the body weight.

## 88 **Challenge test**

89 After the feeding experiment, 25 shrimp were random selected from each aquarium and transferred  
90 to a tank with 30 L of seawater for challenge test. The live *Vibrio parahaemolyticus* E1 ATCC 17802  
91 Strains was used for challenge, which was cultured aerobically in 2216E broth (Qingdao Hope Biol-  
92 Technology Co., Ltd) at 28 °C for 18 h. Preliminary experiment showed the appropriate bacteria dose  
93 was  $10^7$  CFU/mL. During the challenge experiment, the shrimp were fed with basical diet.

## 94 **Histology of the Midgut**

95 The histology determine was carried out as described in [Sha et al. \(2016\) \[20\]](#). Five shrimps were  
96 freely selected from each treatment group upon termination of the feeding and challenge experiments  
97 and sampled the midguts to dissect and fix (60% absolute ethanol, 30% trichloromethane, 10% acetic  
98 acid) for 19 h. Following, the fixed tissues were dehydrated in ascending concentrations of alcohol  
99 (70, 80, 95, and 100%), cleared in toluene, embedded in paraffin, and sectioned at  $10 \mu\text{m}$  with a rotary  
100 microtome. The sectioned tissues were stained with hematoxylin and eosin, and images were obtained

101 with a light microscope.

## 102 **Protein extraction and separation by 1D gel**

103 Upon termination of the feeding experiment, the midguts of twenty shrimps from each treatment  
104 group were dissected and the intestinal contents was removed by flushing with sterile pre-cooled PBS.  
105 Total intestine proteins were extracted as the method described by [Sengupta et al. \(2011\) \[23\]](#) with  
106 some modifications. Pooled samples (1 g) were thoroughly grind into fine powder in liquid nitrogen  
107 with mortar and pestle and dissolved in 5 mL extraction buffer (0.5 M Tris-HCl (pH 7.5), 0.7 M sucrose,  
108 0.1 M KCl, 50 mM EDTA, 40 mM DTT) at room temperature for 15min. After adding equal volume  
109 of Tris-phenol and shaking for 30 min, the upper phenolic phase was collected by centrifuging (8000  
110 × g) for 5 min at 4 °C, and an equal volume of extraction buffer was added to the supernatant. For  
111 protein precipitation, four volumes of 0.1 M ammonium acetate in methanol were added and kept  
112 overnight at -20 °C. Protein pellet was collected after centrifugation at 8000 × g for 10 min at 4°C, and  
113 washed thrice with ice-cold acetone at 4°C. The pellet was dried in vacuum for 2 h and then solubilized  
114 in 100 µL rehydration solution (8 M (w/v) urea, 0.1 M (w/v) Tris, 10 mM DTT). The concentration of  
115 protein was determined using the Bradford method [\[24\]](#). Finally, proteins were loaded on 10% SDS-  
116 PAGE and separated at 120 V for 2 h, and visualized using colloidal Coomassie Blue after  
117 electrophoresis.

## 118 **Trypsin in-gel digestion**

119 Protein gels were washed thrice with 50% acetonitrile (ACN)/50% NH<sub>4</sub>HCO<sub>3</sub> (100mM) for 10  
120 min to destain, and dried in vacuum concentrator. The gels were dissolve in 200 µL 10 mM DTT  
121 containing 50 mM NH<sub>4</sub>HCO<sub>3</sub> (pH 8.0) for 1h at 37 °C water bath, and then destained by 100 µL

122 acetonitrile (ACN). Then, alkylation was performed with 55 mM iodoacetamide (Sigma-Aldrich)/50  
123 mM NH<sub>4</sub>HCO<sub>3</sub> (pH 8.0) for 30 min in the dark. The gel bands were alternately washed twice with 10  
124 mM NH<sub>4</sub>HCO<sub>3</sub> and 100% ACN, respectively. The gels were dried by Speed-Vac and digested with  
125 trypsin (0.01 μg/μl) (Promega, Madison, WI) in 10 mM NH<sub>4</sub>HCO<sub>3</sub> at 37 °C overnight. Digestion was  
126 stopped by adding 60% ACN/5% formic acid (FA) solution.

### 127 **Nanoflow liquid chromatography-tandem mass spectrometry**

128 Prior to analyse the tryptic digest extracts using Thermo Scientific EASY-nLC 1000 System (Nano  
129 HPLC), the crude polypeptides were firstly desalted with a ChromXP Trap column (Nano LC TRAP  
130 Column, 3 μm C<sub>18</sub>-CL, 120 Å, 350 μm×0.5mm, Foster City, CA, USA), and then eluted onto a second  
131 analytical column of Nano LC C<sub>18</sub> reversed-phase column (3C<sub>18</sub>-CL, 75 μm × 15 cm, Foster City, CA,  
132 USA) under a linear gradient formed by mobile phases A (5% ACN and 0.1% FA) and B (95% CAN  
133 and 0.1% FA) at a flow rate of 300 nL/min for 120 min. Triple TOF 5600 MS (Foster City, CA, USA)  
134 was performed to automatically switch the TOF-MS and production acquisition in data-dependent  
135 mode by Analyst (R) Software (TF1.6).

### 136 **Protein identification**

137 Three biological replicates were performed for the control, R and L group. The LC-MS/MS raw  
138 data were processed using the MaxQuant (version 1.5.2.8) for peptide/protein identification and  
139 quantification. MS/MS spectra was searched by the Andromeda search engine using a database  
140 consisting 28,384 sequences of the shrimp transcriptome, downloaded from NCBI. Search parameters  
141 were as follows: monoisotopic mass values; enzyme was trypsin; static Modification with C  
142 carboxyamidomethylation (57.021 Da); dynamic Modification was M Oxidation (15.995Da);

143 Precursor ion mass tolerance  $\pm 15$  ppm; Fragment ion mass tolerance with  $\pm 20$  mmu; allowance of  
144 two missed cleavage site; false discovery rate (FDR) set as 0.01. Peptides identification with 95%  
145 confidence are considered “significant sequences”. For protein quantification, a minimum of  
146 two ratio counts was set to compare and normalize protein intensities across runs [25]. The absolute  
147 abundance of different proteins were then calculated using the intensity-based absolute quantification  
148 (iBAQ) algorithm, and iBAQ data were used for the t-test [26].

### 149 **Bioinformatics analysis**

150 Gene ontology (GO) enrichment and Kyoto Encyclopedia of Genes and Genomes (KEGG)  
151 annotation for each protein in the search database were analyzed in GO (<http://www.geneontology.org/>)  
152 and KEGG Pathway database (<http://www.genome.jp/Pathway>), respectively. GO project provide  
153 three ontologies analysis, namely molecular functions (MF), cellular components (CC), and biological  
154 process (BP) [27]. Subcellular localisation for each protein was predicted according to GO annotation  
155 by Uniprot software (<http://www.uniprot.org/>). GO items without corresponding annotation were first  
156 deleted from the protein table, and then the IDs of listed proteins were plotted at the BP, CC, and MF  
157 levels. In addition, differentially expressed proteins (fold changes  $> 1.5$ ,  $p < 0.05$ ) were mapped to  
158 the GO database, and the number of proteins at each GO term was computed. The results from label-  
159 free proteomics were used as the target list. The background list was generated by downloading the  
160 GO database.

### 161 **Quantitative real-time PCR**

162 RNA was prepared from midguts of ten *L. vanna* that had been used for Real-time PCR  
163 analysis. Total RNA was extracted using the E.Z.N.A. HP Total RNA Kit (Omega Bio-Tek, Norcross,



164 GA, USA) and reverse-transcribed into first-strand cDNA using the RevertAid First Strand cDNA  
165 Synthesis Kit (Thermo Fisher Scientific) according to the manufacturer's instructions. Seven proteins  
166 including hemocyanin (Hem), C1q-binding protein (C1q), calreticulin (Cal), pyruvate kinase 2 (Pyr),  
167 integrin (Int), proliferating cell nuclear antigen (Pro), hemocyte transglutaminase (Htr) were selected  
168 to determine their mRNA levels, all of which were annotated to *L. vannamei* and were important  
169 proteins functioning in immune response, metabolic, adhesion and cell-cell signaling. The primer  
170 sequences were designed by Primer 5 (S1 Table). The reactions were carried out using Bio-Rad IQ™5  
171 real-time PCR with a total volume of 20  $\mu$ L (2\*SYBR Green Mix (Vazyme Biotech): 10  $\mu$ L, Primer:  
172 1.0  $\mu$ L, cDNA template: 5.0  $\mu$ L, and PCR grade water: 4.0  $\mu$ L). The qRT-PCR procedure was as  
173 follows: initial denaturation at 95 °C for 2 min; 40 cycles of amplification (95 °C for 15 s, 60 °C for  
174 20 s, and 72 °C for 20 s). The cycle threshold (Ct) was measured, and the relative gene expression was  
175 calculated using the  $2^{-\Delta\Delta C_t}$  method.  $\beta$ -actin gene was used as endogenous control. Three biological  
176 replicates and three technical replicates were done for all PCR experiments, and significance was  
177 determined at the  $P < 0.05$ .

## 178 Results and discussion

### 179 Histology of the Midgut

180 To investigate the effects of dietary Lici-treated probiotics on the midgut of the shrimp, a  
181 histological study was performed at the end of the feeding experiment and challenge assay as shown  
182 in Fig 1. Compared with the control group, the mucosae of R group improved more dense and more  
183 bloom (Fig 1B), but the mucosae of L group shrimps displayed to thin and loose (Fig 1C). After the  
184 shrimps were challenged by the *V. parahaemolyticus* E1, the mucosae shed and piled in the intestinal  
185 lumen, and the lamina propria exposed and appeared loose in the control and L groups (Figs 1D and

186 1F), especially, some individuals showed some reduced folding of the digestive epithelium in the  
187 crease. However, the shrimps fed with normal HC-2 appeared to no signs of necrotic enterocytes or  
188 cell damage (Fig 1E).

### 189 **Label-free proteomic analysis of intestine proteins of *L. vannamei***

190 In total, 2,810 proteins were detected. The differential protein expression among the three groups  
191 as shown in S2 Appendix, and proteins with fold change  $\geq \pm 1.5$  and  $P < 0.05$  were considered to be  
192 significantly differentially abundant. Pairwise comparison of intestinal protein with different levels  
193 among R/control, L/control, and L/R are illustrated in Fig 2, identified 210, 510 and 458 differentially  
194 abundant proteins, respectively. The numbers of upregulated proteins were 110, 134, and 85,  
195 respectively, whereas 101, 376, and 373 proteins, respectively, were down-regulated. The relationships  
196 among the experimental groups was performed by a PCoA analysis in proteins expression patten form.  
197 Samples of C, R and L group were clustered independently (Fig 3). To comprehensively analyze the  
198 impact of HC-2 and LiCl-treated HC-2 had on protein expression changes, the differentially abundant  
199 proteins were subjected to cluster analysis under different experimental conditions (Fig 4). Heat map  
200 showed that samples of C, R and L group were clustered respectively. The results of the heat map and  
201 PCoA were consistent to some extent, indicating that the proteins expression in C, R and L groups  
202 differed and that the proteins expression in the midgut was influenced by the addition of HC-2 and  
203 LiCl-treated HC-2.

### 204 **GO analysis of DEPs in *L. vannamei* midguts**

205 Based on the gene ontology (GO) analysis in level 2 of biological process, cellular components  
206 and molecular functions associated with the significantly differentially abundant intestinal proteins (q-

207 value  $< 0.05$ , and  $\log_2 |\text{fold change}| > 1.5$ ) (Fig 5). Among the 210 differentially abundant proteins in  
208 the R/control comparison, 93 proteins played a role in 23 different biological processes, 139 proteins  
209 were related to cellular component and 46 proteins had distinct molecular functions. Compared with  
210 the control group, 510 differentially abundant proteins in the L group comprised 189 proteins that  
211 participated in 25 biological processes, 100 proteins had specific molecular functions, and 318 proteins  
212 were related to cellular components. Biological process analysis indicated that the transport, signal  
213 transduction, reproduction, immune system process, protein transport, transmembrane transport,  
214 embryo development, cell cycle, cell death, carbohydrate metabolic process, vesicle-mediated  
215 transport, growth, protein targeting, cell-cell signaling and cell adhesion processes involved the  
216 majority of proteins in R/control or L/control comparison. Cellular component analysis of R/control  
217 and L/control comparison revealed that the main differentially abundant proteins belonged to  
218 cytoplasm, membrane, nucleus, plasma membrane, mitochondrion, cytoskeleton, extracellular region  
219 and endoplasmic reticulum. Molecular function analysis revealed that most differentially abundant  
220 proteins were related to metal Ion binding and transmembrane transporter activity in both the R/control  
221 and L/control comparisons. Comparing L to R, 177 proteins played roles in the biological processes  
222 of transport, reproduction, signal transduction, vesicle-mediated transport, cell cycle, protein transport,  
223 immune system process, embryo development, growth, cell death, carbohydrate metabolic process,  
224 cell motility, cell-cell signaling, cell division, developmental maturation, protein targeting, membrane  
225 organization, cell adhesion; the cellular component of 290 differentially abundant proteins were  
226 cytoplasm, membrane, nucleus, mitochondrion, cytoskeleton, plasma membrane, extracellular region,  
227 endoplasmic reticulum, ribosome and Golgi apparatus; and 100 differentially abundant proteins in the

228 molecular functions categories were related to metal ion binding, transmembrane transporter activity  
229 and signal transducer activity.

### 230 **KEGG pathway analysis of the DEPs in *L. vannamei* midguts**

231 KEGG pathway analysis was performed to determine the biological pathways that involved the  
232 differentially abundant proteins (q-value < 0.05, and log<sub>2</sub> |fold change| > 1.5) induced by HC-2 and  
233 LiCl-treated HC-2 treatments fed in the diet (Fig 6). The DEGs between R group and the control group  
234 mainly enriched in mTOR signaling pathway, ECM-receptor interaction, RNA degradation, Apoptosis,  
235 Phagosome, Butanoate metabolism and Oxidative phosphorylation. The DEGs between the L and  
236 control group mainly enriched in Protein processing in endoplasmic reticulum, RNA transport,  
237 Tyrosine metabolism, Arginine and proline metabolism, Lysosome, mRNA surveillance pathway,  
238 Cysteine and methionine metabolism and Glutathione metabolism. The DEGs between R and L group  
239 mainly enriched in Protein processing in endoplasmic reticulum, Endocytosis, Ribosome, Lysosome,  
240 Glycolysis/Gluconeogenesis, Cysteine and methionine metabolism and Tyrosine metabolism.

### 241 **Proteins potentially involved in shrimp immune response, metabolic, cell-adhesion and cell- 242 signaling process**

243 The GO enrichment analysis of biological process of the significantly different proteins involved  
244 in shrimp immune system process, cell-cell signaling process, cell adhesion and carbohydrate  
245 metabolic process among the three groups as shown in S3 Table 1. In the R/control group, 10 proteins  
246 involved in immune system process, 7 proteins involved in cell-cell signaling process, 5 proteins  
247 involved in cell adhesion and 4 proteins involved in carbohydrate metabolic process were significantly  
248 increased, and 3, 5 proteins involved in immune and carbohydrate metabolic process were significantly

249 decreased. Among them, tyrosine-tRNA ligase, C1q-binding protein, tyrosine-protein phosphatase  
250 69D-like and Neutral alpha-glucosidase AB were most up-regulated in the four process that the  
251 expression level reached 10.28, 5.66, 2.88 and 6.77 fold, respectively. However, in the L/control group,  
252 there didn't induce more proteins up-regulation, and 22, 12, 6 and 18 proteins were participated in  
253 immune, cell-cell signaling, cell adhesion and carbohydrate metabolic process respectively were  
254 significantly down-regulated.

255 Based on the KEGG enrichment analysis, several of the proteins that were differentially expressed  
256 in shrimp fed with probiotic are involved in immune system process (mTOR signaling pathway,  
257 Apoptosis, Phagosome, Oxidative phosphorylation, MAPK signaling pathway, Lysosome, Protein  
258 processing in endoplasmic reticulum), Metabolism process (Arginine and proline metabolism,  
259 Tyrosine metabolism, Glutathione metabolism, Glycerolipid metabolism/Histidine metabolism,  
260 Cysteine and methionine metabolism, Fatty acid metabolism, Carbon metabolism), cell adhesion  
261 process (Focal adhesion, Tight junction, ECM-receptor interaction), and Cell signaling process  
262 (Calcium signaling pathway, Oxytocin signaling pathway, FoxO signaling pathway and Wnt signaling  
263 pathway) (S3 Table 2).

#### 264 **Analysis of selected proteins affected by HC-2 and LiCl-treated HC-2 treatments**

265 To validate the label-free based proteomic results, quantitative real-time PCR was used to analyze  
266 the transcripts of proteins found to be differentially abundant after HC-2 and LiCl-treated HC-2  
267 treatments (Fig 7). The qPCR results showed that three proteins (Int, Pro and Htr) expressed higher  
268 than determined in R group proteome, the other proteins were consistent with the proteomics data,  
269 which further confirmed the reliability of label-free sequence.

## 270 Discussion

271 Gastro-intestinal tract, the most important digestive and absorption organ in shrimps, where  
272 residing a large number of microorganisms with complex structures. These organisms depend on and  
273 restrict each other with hosts, and forming a unique intestinal micro-ecosystem in the long process of  
274 evolution [28]. Recent years, it is widely recognized that supplement with probiotics in aquaculture  
275 may stabilize the indigenous microflora, and normalize the host-microbe interaction, which is  
276 contribute to reduce the incidence of diseases [29]. Our previous work demonstrated that *L. pentosus*  
277 HC-2 has ideal probiotic effect to *L. vannamei*, but the probiotic action of surface components of HC-2  
278 to shrimp is not clear. This work, to investigate the impact of surface proteins on probiotic effect of  
279 HC-2 to *L. vannamei*, proteomic analyses were conducted to using a label-free based LC-MS/MS  
280 approach to obtain protein data from three biological replicates.

281 Several studies demonstrated that dietary probiotic supplementation could improve the growth  
282 performance which was deemed to be attributed to intestinal physiology changes and gut epithelium  
283 morphology changes [30, 31], such as an improved intestinal microvillus structure and a greater  
284 absorptive surface area [32, 33]. In the present study, the changes in the intestinal microvilli and the  
285 folding of the digestive epithelium varied between dietary groups, and obvious improvement in  
286 intestinal histology was observed after shrimp fed with the normal probiotic HC-2, and the intestinal  
287 tissue was not damaged after the shrimp were challenged by *V. parahaemolyticus* E1. These results  
288 are similar to the findings of Merrifield et al. (2010) [33], who found that *Pediococcus acidilactici* -  
289 fed fish had significantly longer microvilli than other groups of fish, but are contrary to the findings  
290 of Sha et al. (2016) [20], who reported that dietary HC-2 didn't improve the intestinal morphology of  
291 *L. vannamei*. These differently phenomena may be attributable to the bacteria concentration used in

292 the dietary is too low ( $10^7$  CFU/g) than in this work ( $5 \times 10^8$  CFU/g), which hinder the HC-2 to be the  
293 dominant microflora in the shrimp intestines to improve the intestinal morphology. However, no signs  
294 improvement in intestinal histology post the shrimp fed with LiCl-treated HC-2, instead, even to be  
295 more badly compared with the control shrimp that the mucosae showed to thin and loose after the  
296 shrimp challenged by pathogens. This results indicated that the surface proteins play important roles  
297 in probiotic function of HC-2 to improve the gut physiology and morphology.

298 With the intensive development of aquaculture and the frequent outbreaks of disease, varied  
299 probiotics have been developed to meet the demand of pollution-free immune enhancer. In shrimp  
300 farming, many authors have studied the influence of probiotic on the immune response. For example,  
301 [Wang et al. \(2010\) \[34\]](#) indicated that fed with *Lactobacillus* enhanced shrimp growth performance,  
302 increased digestive enzyme activities, and promoted non-specific immunity. [Zheng et al. \(2017\) \[35\]](#)  
303 also revealed that the administration of *Lactobacillus pentosus* AS13 effectively improved the shrimp  
304 growth performance, feed utilization, digestive enzymes and disease resistance. In present work, the  
305 proteomic analysis showed that fed with the normal HC-2 induced the proteins involved in immune  
306 system process (mTOR signaling pathway, Apoptosis, Phagosome, Oxidative phosphorylation,  
307 MAPK signaling pathway, Lysosome, Protein processing in endoplasmic reticulum) up-regulation, but  
308 many immune-related proteins were down-regulation in LiCl-treated HC-2 group shrimp midgut,  
309 which suggesting surface proteins play vital roles in mediation HC-2 enhance the shrimp intestinal  
310 immune response.

311 Several available genomic information described the metabolic activities of lactobacilli,  
312 which indicated that surface proteins are importance of carbohydrate metabolism in the host [\[36\]](#). It  
313 has been reported that *Lactobacillus paracasei* or *Lactobacillus rhamnosus* probiotics supplementation

314 of HBF mice exerted microbiome modification and resulted in altered hepatic lipid metabolism  
315 coupled with lowered plasma lipoprotein levels and apparent stimulated glycolysis, and also affected  
316 diverse range of metabolism pathways including amino-acid metabolism, methylamines and SCFAs  
317 [37]. In the present study, we found some proteins involved in carbohydrate metabolic process were  
318 significantly up-regulation after shrimp fed with normal HC-2, but proteins participated in other  
319 metabolic pathway including Arginine and proline, Tyrosine, Glutathione, Glycerolipid/Histidine,  
320 Cysteine and methionine, Fatty acid metabolism expressed insignificance. While, feeding with LiCl-  
321 treated HC-2 led to the overall downregulation of these metabolism related proteins, which indicated  
322 that surface proteins are importance in HC-2 regulation and maintenance of the shrimp intestinal  
323 metabolic.

324 Adhesion is the interaction of the bacteria surface structure (adhesin) attached with the surface  
325 receptors on the epithelial cells of the host, is the first step of bacterial colonization, and is the key for  
326 bacteria to grow, reproduce and functional exercise. Recent studies have indicated that the attachment  
327 of bacteria including the hydrophobicity and self-agglutination of the bacterial surface,  
328 lipoteichoicacid (LTA), exopolysaccharides (EPS) and related cell surface proteins to mucosal  
329 surfaces is the initial event in intestinal adhesion and colonization [38, 16]. Meanwhile, there are many  
330 surface proteins that mediate adhesion in lactobacillus have been reported, such as CmbA/Lar\_0958,  
331 EF-Tu, GAPDH, GroEL, Lam29, MapA , MBF, Msa , Mub (Mub family), Pili, 32-Mmubp, FbpA and  
332 GroEL, etc [39-41]. Probiotics adhere to host intestinal mucus, intestinal epithelial cells, extracellular  
333 stroma by means of its surface proteins, and/or other bacteria lipodesmoic acid to effectively prevent  
334 pathogenic infection [42-44]. In present study, many related cell adhesion proteins were displayed  
335 significantly up-regulation in shrimp midgut after feeding with the normal HC-2, but the LiCl-treated



336 HC-2 induced many cell adhesion proteins significantly down-regulation. Besides the adhesion ability,  
337 the surface proteins were studied have important functions in cell-cell signaling process, and  
338 interaction with the host immune system or environment [45]. In this study, we found that the proteins  
339 involved in cell-cell signaling pathway were up-regulated in shrimp midgut after fed with the normal  
340 HC-2, but the fed with surface proteins shaving bacteria induced these proteins decreased. These  
341 results indicated that surface proteins play crucial role in adhesion and colonization of HC-2 in the  
342 shrimp midgut, and were contributed to activation of a series of molecular signals communication with  
343 the surface cell of host.

344 In conclusion, fed with normal HC-2 obviously improved the intestinal histology and enhanced  
345 the protective effect against pathogens damages, but fed with LiCl-treated HC-2 didn't improve the  
346 intestinal structure. GO and KEGG enrichment analysis of significantly proteins in R/control and  
347 L/control indicated that most proteins were involved in immune system process, metabolic process,  
348 adhesion process, and cell-cell signaling process. However, these proteins were significantly up-  
349 regulation in shrimp midgut after feeding the normal HC-2, and were significantly down-regulation in  
350 shrimp fed with LiCl-treated HC-2. The results in present work indicated that surface proteins play an  
351 important roles in mediation of HC-2 to improve intestinal histology, immune response, metabolic,  
352 adhesion and signaling communication in midgut of shrimp, which might provide a base data to  
353 understand the probiotic mechanism excised by HC-2.

## 354 **Supporting information**

355 S1 Appendix. Primers. (PDF)

356 S2 Appendix. Different expression proteins (Excel)

357 S3 Appendix. Significantly different expression proteins (PDF)

358 **Acknowledgments**

359 We thank Dr Wenbin Zhan (Laboratory of Pathology and Immunology of Aquatic Animals,  
360 Ocean University of China), for providing *V. parahaemolyticus* E1, and we are grateful to all the  
361 laboratory members for their technical advice and helpful suggestions.

362 **References**

- 363 [1] Ji P-F, Yao C-L, Wang Z-Y. Two types of calmodulin play different roles in Pacific white shrimp  
364 (*Litopenaeus vannamei*) defenses against *Vibrio parahaemolyticus* and WSSV infection. Fish  
365 Shellfish Immunol. Elsevier; 2011; 31: 260-268.
- 366 [2] Lightner D V. Virus diseases of farmed shrimp in the Western Hemisphere (the Americas): a review.  
367 J Invertebr Pathol. Elsevier; 2011; 106: 110-130.
- 368 [3] Li F, Xiang J. Signaling pathways regulating innate immune responses in shrimp. Fish Shellfish  
369 Immunol. Elsevier; 2013; 34: 973-980.
- 370 [4] Verschuere L, Rombaut G, Sorgeloos P, Verstraete W. Probiotic bacteria as biological control  
371 agents in aquaculture. Microbiol Mol Biol Rev. Am Soc Microbiol; 2000; 64: 655-671.
- 372 [5] Dawood MAO, Koshio S, Abdel-Daim MM, Van Doan H. Probiotic application for sustainable  
373 aquaculture. Rev Aquac. Wiley Online Library; 2018;
- 374 [6] Yousefian M, Amiri MS. A review of the use of prebiotic in aquaculture for fish and shrimp.  
375 African J Biotechnol. Academic Journals (Kenya); 2009; 8.
- 376 [7] Ige BA. Probiotics use in intensive fish farming. African J Microbiol Res. Academic Journals; 2013;  
377 7: 2701-2711.

- 378 [8] Maeda M, Shibata A, Biswas G, Korenaga H, Kono T, Itami T, et al. Isolation of lactic acid bacteria  
379 from kuruma shrimp (*Marsupenaeus japonicus*) intestine and assessment of immunomodulatory  
380 role of a selected strain as probiotic. *Mar Biotechnol*. Springer; 2014; 16: 181-192.
- 381 [9] Kesarcodi-Watson A, Kaspar H, Lategan MJ, Gibson L. Probiotics in aquaculture: the need,  
382 principles and mechanisms of action and screening processes. *Aquaculture*. Elsevier; 2008; 274:  
383 1-14.
- 384 [10] Heinemann C, van Hylckama Vlieg JET, Janssen DB, Busscher HJ, van der Mei HC, Reid G.  
385 Purification and characterization of a surface-binding protein from *Lactobacillus fermentum* RC-  
386 14 that inhibits adhesion of *Enterococcus faecalis* 1131. *FEMS Microbiol Lett*. Blackwell  
387 Publishing Ltd Oxford, UK; 2000; 190: 177-180.
- 388 [11] Rojas M, Ascencio F, Conway PL. Purification and characterization of a surface protein from  
389 *Lactobacillus fermentum* 104R that binds to porcine small intestinal mucus and gastric mucin.  
390 *Appl Environ Microbiol*. Am Soc Microbiol; 2002; 68: 2330-2336.
- 391 [12] Roos S, Jonsson H. A high-molecular-mass cell-surface protein from *Lactobacillus reuteri* 1063  
392 adheres to mucus components. *Microbiology*. Microbiology Society; 2002; 148: 433-442.
- 393 [13] Jakava-Viljanen M, Palva A. Isolation of surface (S) layer protein carrying *Lactobacillus* species  
394 from porcine intestine and faeces and characterization of their adhesion properties to different  
395 host tissues. *Vet Microbiol*. Elsevier; 2007; 124: 264-273.
- 396 [14] Chen X, Xu J, Shuai J, Chen J, Zhang Z, Fang W. The S-layer proteins of *Lactobacillus crispatus*  
397 strain ZJ001 is responsible for competitive exclusion against *Escherichia coli* O157: H7 and  
398 *Salmonella typhimurium*. *Int J Food Microbiol*. Elsevier; 2007; 115: 307-312.

- 399 [15] Konstantinov SR, Smidt H, De Vos WM, Bruijns SCM, Singh SK, Valence F, et al. S layer  
400 protein A of *Lactobacillus acidophilus* NCFM regulates immature dendritic cell and T cell  
401 functions. Proc Natl Acad Sci. National Acad Sciences; 2008; pnas-0810305105.
- 402 [16] Kos B, Šušković J, Vuković S, Šimpraga M, Frece J, Matošić S. Adhesion and aggregation ability  
403 of probiotic strain *Lactobacillus acidophilus* M92. J Appl Microbiol. Wiley Online Library; 2003;  
404 94: 981-987.
- 405 [17] der Mei HC, de Belt-Gritter B, Pouwels PH, Martinez B, Busscher HJ. Cell surface  
406 hydrophobicity is conveyed by S-layer proteins-a study in recombinant lactobacilli. Colloids  
407 Surfaces B Biointerfaces. Elsevier; 2003; 28: 127-134.
- 408 [18] Smit E, Oling F, Demel R, Martinez B, Pouwels PH. The S-layer protein of *Lactobacillus*  
409 *acidophilus* ATCC 4356: identification and characterisation of domains responsible for S-  
410 protein assembly and cell wall binding. J Mol Biol. Elsevier; 2001; 305: 245-257.
- 411 [19] Sha Y, Wang B, Liu M, Jiang K, Wang L. Interaction between *Lactobacillus pentosus* HC-2 and  
412 *Vibrio parahaemolyticus* E1 in *Litopenaeus vannamei* in vivo and in vitro. Aquaculture. Elsevier;  
413 2016; 465: 117-123.
- 414 [20] Sha Y, Liu M, Wang B, Jiang K, Qi C, Wang L. Bacterial population in intestines of *litopenaeus*  
415 *vannamei* fed different probiotics or probiotic supernatant. J Microbiol Biotechnol. 2016; 26:  
416 1736-1745.
- 417 [21] Sha Y, Wang L, Liu M, Jiang K, Xin F, Wang B. Effects of lactic acid bacteria and the  
418 corresponding supernatant on the survival, growth performance, immune response and disease  
419 resistance of *Litopenaeus vannamei*. Aquaculture. Elsevier; 2016; 452: 28-36.

- 420 [22] Du Y, Zhou S, Liu M, Wang B, Jiang K, Fang H, et al. Understanding the roles of surface proteins  
421 in regulation of *Lactobacillus pentosus* HC-2 to immune response and bacterial diversity in  
422 midgut of *Litopenaeus vannamei*. Fish Shellfish Immunol. Elsevier; 2019; 86: 1194-1206.
- 423 [23] Sengupta D, Kannan M, Reddy AR. A root proteomics-based insight reveals dynamic regulation  
424 of root proteins under progressive drought stress and recovery in *Vigna radiata* (L.) Wilczek.  
425 Planta. Springer; 2011; 233: 1111-1127.
- 426 [24] Bradford MM. A rapid and sensitive method for the quantitation of microgram quantities of  
427 protein utilizing the principle of protein-dye binding. Anal Biochem. Elsevier; 1976; 72: 248-  
428 254.
- 429 [25] Cox J, Michalski A, Mann M. Software lock mass by two-dimensional minimization of peptide  
430 mass errors. J Am Soc Mass Spectrom. Springer; 2011; 22: 1373-1380.
- 431 [26] Lubber CA, Cox J, Lauterbach H, Fancke B, Selbach M, Tschopp J, et al. Quantitative proteomics  
432 reveals subset-specific viral recognition in dendritic cells. Immunity. Elsevier; 2010; 32: 279-  
433 289.
- 434 [27] Consortium GO. The Gene Ontology (GO) database and informatics resource. Nucleic Acids Res.  
435 Oxford University Press; 2004; 32: D258--D261.
- 436 [28] Cardona E, Gueguen Y, Magré K, Lorgeoux B, Piquemal D, Pierrat F, et al. Bacterial community  
437 characterization of water and intestine of the shrimp *Litopenaeus stylirostris* in a biofloc system.  
438 BMC Microbiol. BioMed Central; 2016;16: 157.
- 439 [29] Lara-Flores M. The use of probiotic in aquaculture: an overview. Int Res J Microbiol. 2011;2:  
440 471-478.

- 441 [30] Daniels CL, Merrifield DL, Boothroyd DP, Davies SJ, Factor JR, Arnold KE. Effect of dietary  
442 Bacillus spp. and mannan oligosaccharides (MOS) on European lobster (*Homarus gammarus* L.)  
443 larvae growth performance, gut morphology and gut microbiota. Aquaculture. Elsevier; 2010;  
444 304: 49-57.
- 445 [31] Li P, Burr GS, Gatlin III DM, Hume ME, Patnaik S, Castille FL, et al. Dietary supplementation  
446 of short-chain fructooligosaccharides influences gastrointestinal microbiota composition and  
447 immunity characteristics of Pacific white shrimp, *Litopenaeus vannamei*, cultured in a  
448 recirculating system. J Nutr. Oxford University Press; 2007; 137: 2763-2768.
- 449 [32] de Rodrigáñez MA, Diaz-Rosales P, Chabrilón M, Smidt H, Arijo S, León-Rubio JM, et al. Effect  
450 of dietary administration of probiotics on growth and intestine functionality of juvenile  
451 Senegalese sole (*Solea senegalensis*, Kaup 1858). Aquac Nutr. Wiley Online Library; 2009;15:  
452 177-185.
- 453 [33] Merrifield DL, Harper GM, Dimitroglou A, Ringø E, Davies SJ. Possible influence of probiotic  
454 adhesion to intestinal mucosa on the activity and morphology of rainbow trout (*Oncorhynchus*  
455 *mykiss*) enterocytes. Aquac Res. Wiley Online Library; 2010; 41: 1268-1272.
- 456 [34] Wang G, Huang Y, Zhou Y, Dong S, Huang W, Yan Q, et al. Effects of Lactobacillus on growth  
457 performance, digestive enzyme activities and non-specific immunity of *Litopenaeus vannamei*.  
458 Chinese J Anim Nutr. Chinese Association of Animal Science and Veterinary Medicine; 2010;  
459 22: 228-234.
- 460 [35] Zheng CN, Wang W. Effects of *Lactobacillus pentosus* on the growth performance, digestive  
461 enzyme and disease resistance of white shrimp, *Litopenaeus vannamei* (Boone, 1931). Aquac  
462 Res. Wiley Online Library; 2017; 48: 2767-2777.

- 463 [36] Lebeer S, Vanderleyden J, De Keersmaecker SCJ. Genes and molecules of lactobacilli supporting  
464 probiotic action. *Microbiol Mol Biol Rev. Am Soc Microbiol*; 2008; 72: 728-764.
- 465 [37] Martin F-PJ, Wang Y, Sprenger N, Yap IKS, Lundstedt T, Lek P, et al. Probiotic modulation of  
466 symbiotic gut microbial-host metabolic interactions in a humanized microbiome mouse model.  
467 *Mol Syst Biol. EMBO Press*; 2008; 4: 157.
- 468 [38] Granato D, Perotti F, Masserey I, Rouvet M, Golliard M, Servin A, et al. Cell surface-associated  
469 lipoteichoic acid acts as an adhesion factor for attachment of *Lactobacillus johnsonii* La1 to  
470 human enterocyte-like Caco-2 cells. *Appl Environ Microbiol. Am Soc Microbiol*; 1999; 65:  
471 1071-1077.
- 472 [39] Nishiyama K, Sugiyama M, Mukai T. Adhesion properties of lactic acid bacteria on intestinal  
473 mucin. *Microorganisms. Multidisciplinary Digital Publishing Institute*; 2016; 4: 34.
- 474 [40] Buck BL, Altermann E, Svingerud T, Klaenhammer TR. Functional analysis of putative adhesion  
475 factors in *Lactobacillus acidophilus* NCFM. *Appl Environ Microbiol. Am Soc Microbiol*; 2005;  
476 71: 8344-8351.
- 477 [41] Bergonzelli GE, Granato D, Pridmore RD, Marvin-Guy LF, Donnicola D, Corthésy-Theulaz IE.  
478 GroEL of *Lactobacillus johnsonii* La1 (NCC 533) is cell surface associated: potential role in  
479 interactions with the host and the gastric pathogen *Helicobacter pylori*. *Infect Immun. Am Soc*  
480 *Microbiol*; 2006; 74: 425-434.
- 481 [42] Hynönen U, Westerlund-Wikström B, Palva A, Korhonen TK. Identification by flagellum display  
482 of an epithelial cell- and fibronectin-binding function in the SlpA surface protein of *Lactobacillus*  
483 *brevis*. *J Bacteriol. Am Soc Microbiol*; 2002; 184: 3360-3367.

- 484 [43] Johnson-Henry KC, Hagen KE, Gordonpour M, Tompkins TA, Sherman PM. Surface-layer  
485 protein extracts from *Lactobacillus helveticus* inhibit enterohaemorrhagic *Escherichia coli* O157:  
486 H7 adhesion to epithelial cells. *Cell Microbiol.* Wiley Online Library; 2007; 9: 356-367.
- 487 [44] Antikainen J, Anton L, Sillanpää J, Korhonen TK. Domains in the S-layer protein CbsA of  
488 *Lactobacillus crispatus* involved in adherence to collagens, laminin and lipoteichoic acids and in  
489 self-assembly. *Mol Microbiol.* Wiley Online Library; 2002; 46: 381-394.
- 490 [45] Kaper JB, Sperandio V. Bacterial cell-to-cell signaling in the gastrointestinal tract. *Infect Immun.*  
491 *Am Soc Microbiol*; 2005; 73: 3197-3209.



492 **Figure caption.**

493 **Fig 1.** Histology with hematoxylin and eosin staining of the shrimp midguts after feeding with different  
494 diets for 4 weeks. Images A, B, C, D, E and F are arbitrarily chosen examples of the histology observed  
495 in three groups. A: Gut histology of shrimps were fed a basic diet; B: Gut histology of shrimps were  
496 fed a basic diet supplied with normal *L. pentosus* HC-2; C: Gut histology of shrimps were fed a basic  
497 diet supplied with LiCl-treated *L. pentosus* HC-2; D, E and F were showed the gut histology of shrimps  
498 in A, B and C respectively which were challenged by *Vibrio parahaemolyticus* E1. LP: lamina propria,  
499 M: mucosae, MV: microvilli, SCE: surface cell epithelium. Bar: 100  $\mu$ m.

500 **Fig 2.** Volcano plot of changes in the levels of identified intestine proteins of shrimp analyzed using  
501 label-free quantitative proteomics after feeding with different diets. Note: C, shrimps were fed with  
502 basal diet; R, shrimps were fed with basal diet supplemented with normal *L. pentosus* HC-2; L, shrimps  
503 were fed with basal diet supplemented with LiCl-treated *L. pentosus* HC-2 (L).

504 **Fig 3.** Principal coordinates analysis scores based on the Unifrac distance. PC1: the first principle  
505 component; PC2: the second principle component. Shrimps were fed a basal diet (C) or a basal diet  
506 supplemented with *L. pentosus* HC-2 (R), LiCl-treated *L. pentosus* HC-2 (L).

507 **Fig 4.** Heat map of the proteins expression diversity among the three groups (9 samples). Shrimps  
508 were fed a basal diet (C [C1, C2, C3]) or a basal diet supplemented with normal *L. pentosus* HC-2 (R  
509 [R1, R2, R3]), and LiCl-treated *L. pentosus* HC-2 (L [L1, L2, L3]).

510 **Fig 5.** Functional categorization based on gene ontology (GO) in biological process, cellular  
511 components and molecular functions level analysis of significantly differentially abundant intestinal  
512 proteins. Shrimps were fed a basal diet (C) or a basal diet supplemented with *L. pentosus* HC-2 (R),  
513 LiCl-treated *L. pentosus* HC-2 (L).

514 **Fig 6.** Distribution of differentially abundant proteins in shrimp midgut in KEGG pathways (Top 20).  
515 Note: Shrimps were fed a basal diet (C) or a basal diet supplemented with *L. pentosus* HC-2 (R), LiCl-  
516 treated *L. pentosus* HC-2 (L).

517 **Fig 7.** Validation analysis of label-free proteomics using quantitative real-time PCR to determine the  
518 selected proteins expression in midgut of *L. vannamei*. Note: R, shrimps were fed with basal diet  
519 supplemented with normal *L. pentosus* HC-2; L, shrimps were fed with basal diet supplemented with  
520 LiCl-treated *L. pentosus* HC-2 (L). Fold changes of proteins expression represent experimental group  
521 compared with control group.

522

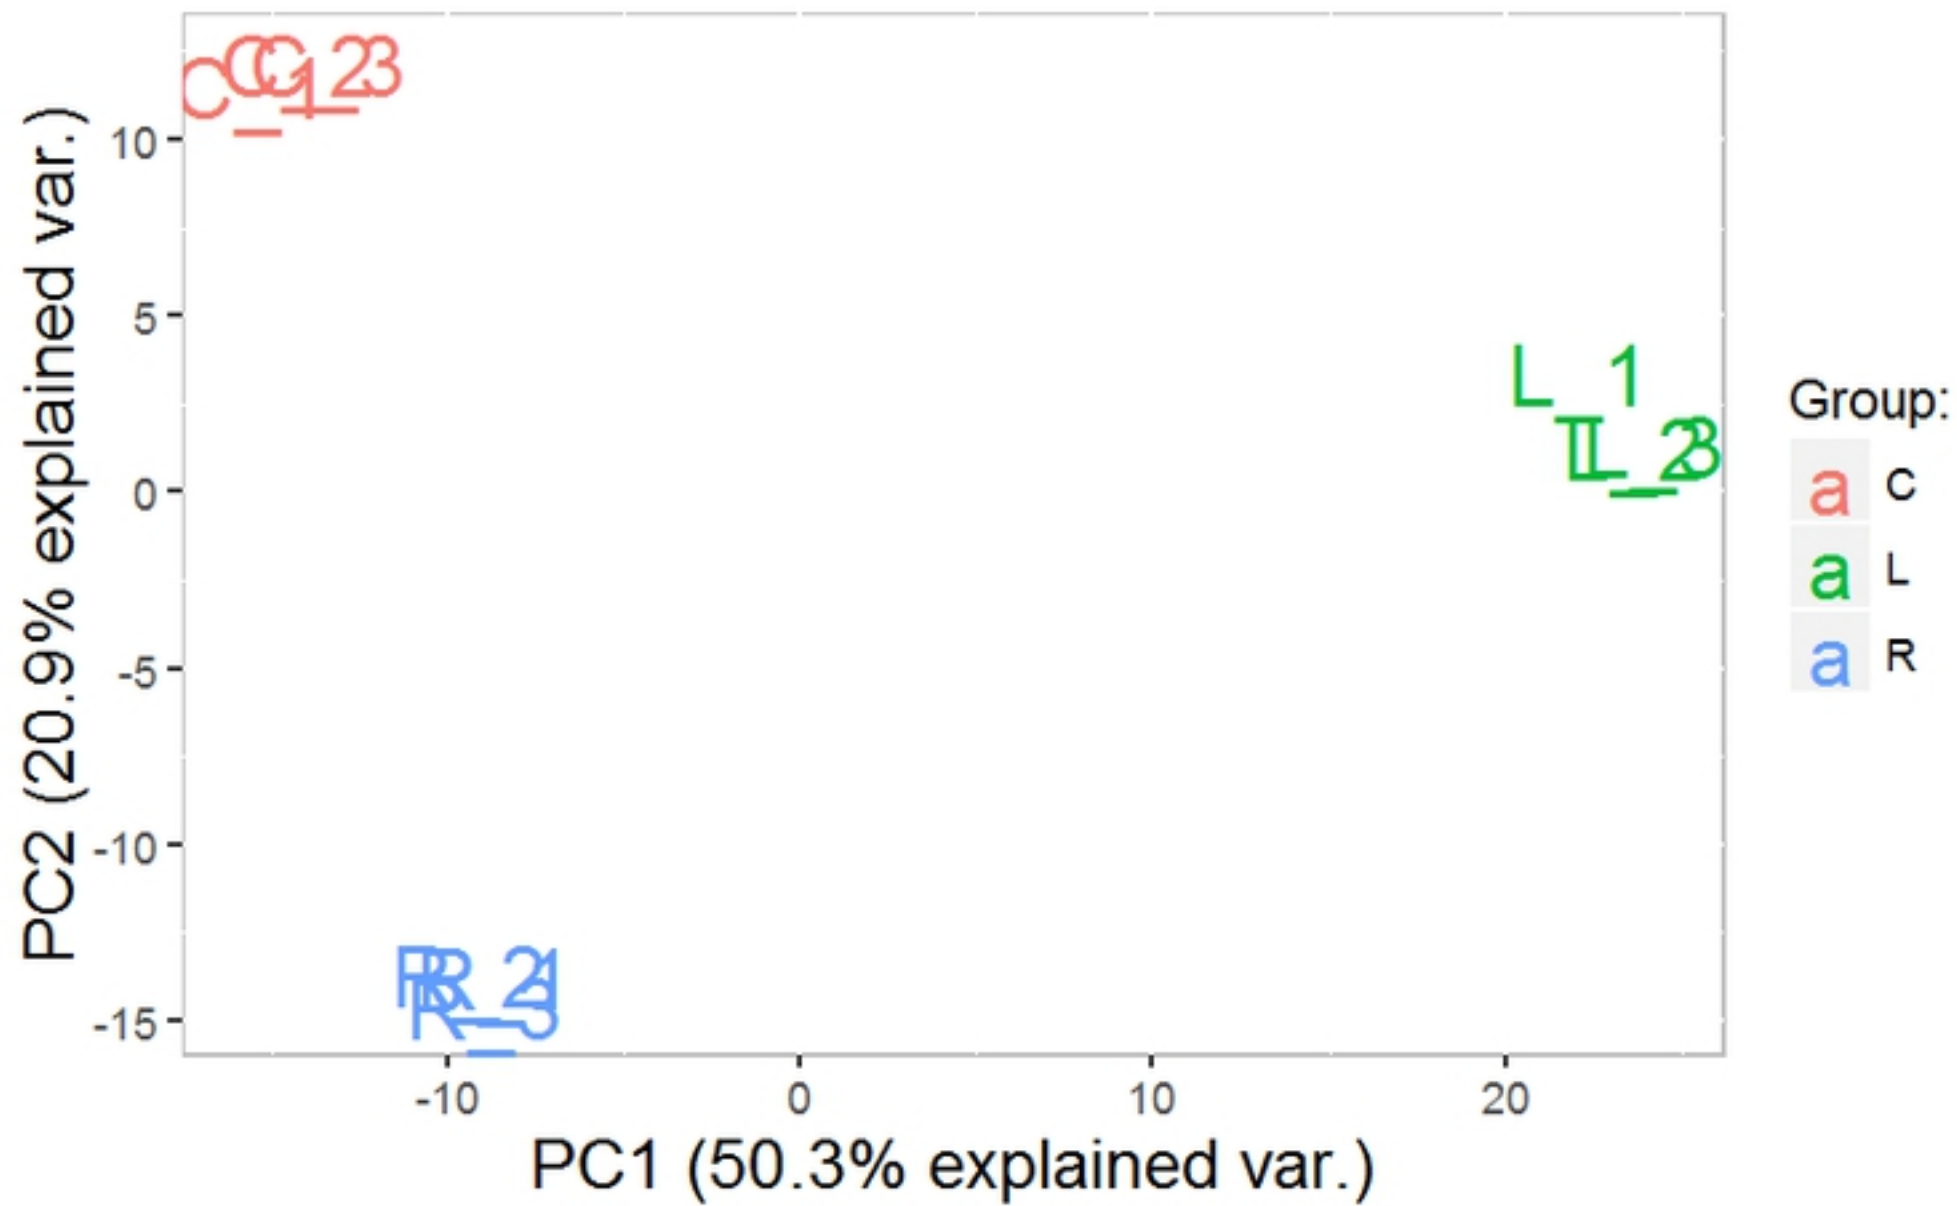

Figure

bioRxiv preprint doi: <https://doi.org/10.1101/546762>; this version posted February 11, 2019. The copyright holder for this preprint (which was not certified by peer review) is the author/funder, who has granted bioRxiv a license to display the preprint in perpetuity. It is made available under aCC-BY 4.0 International license.

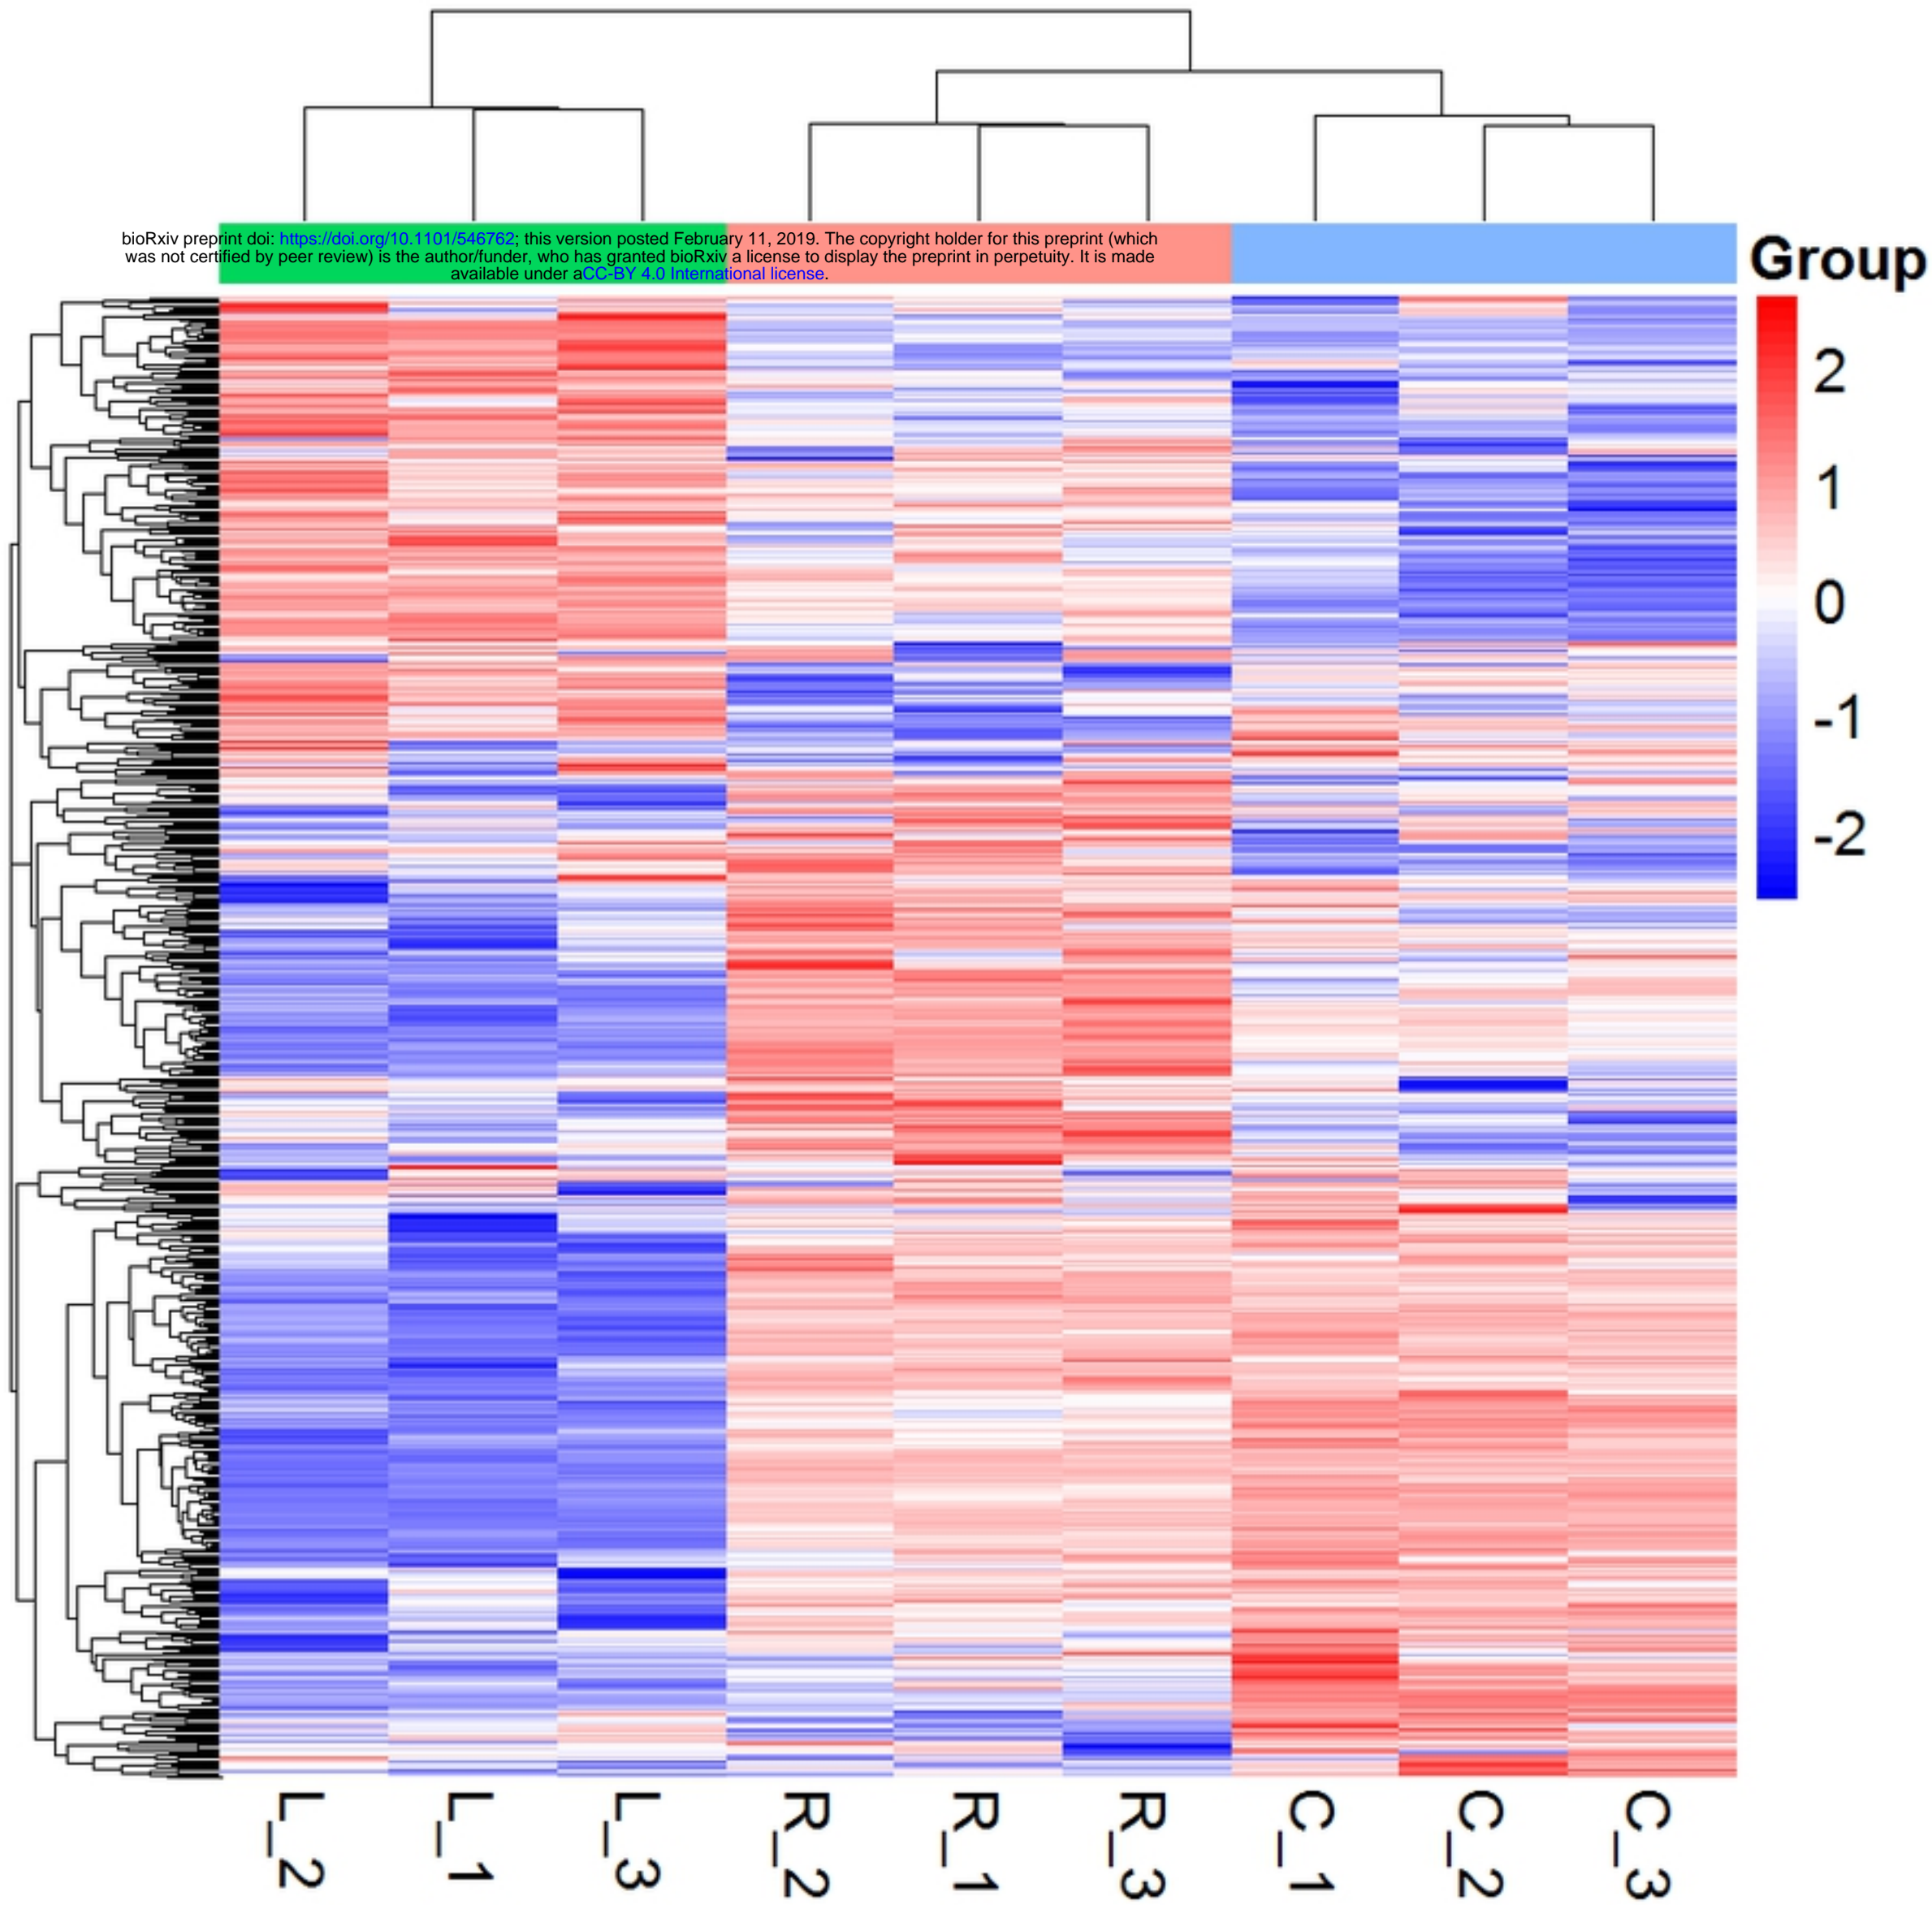

Figure

(P1) R-vs-C KEGG pathway enrichment

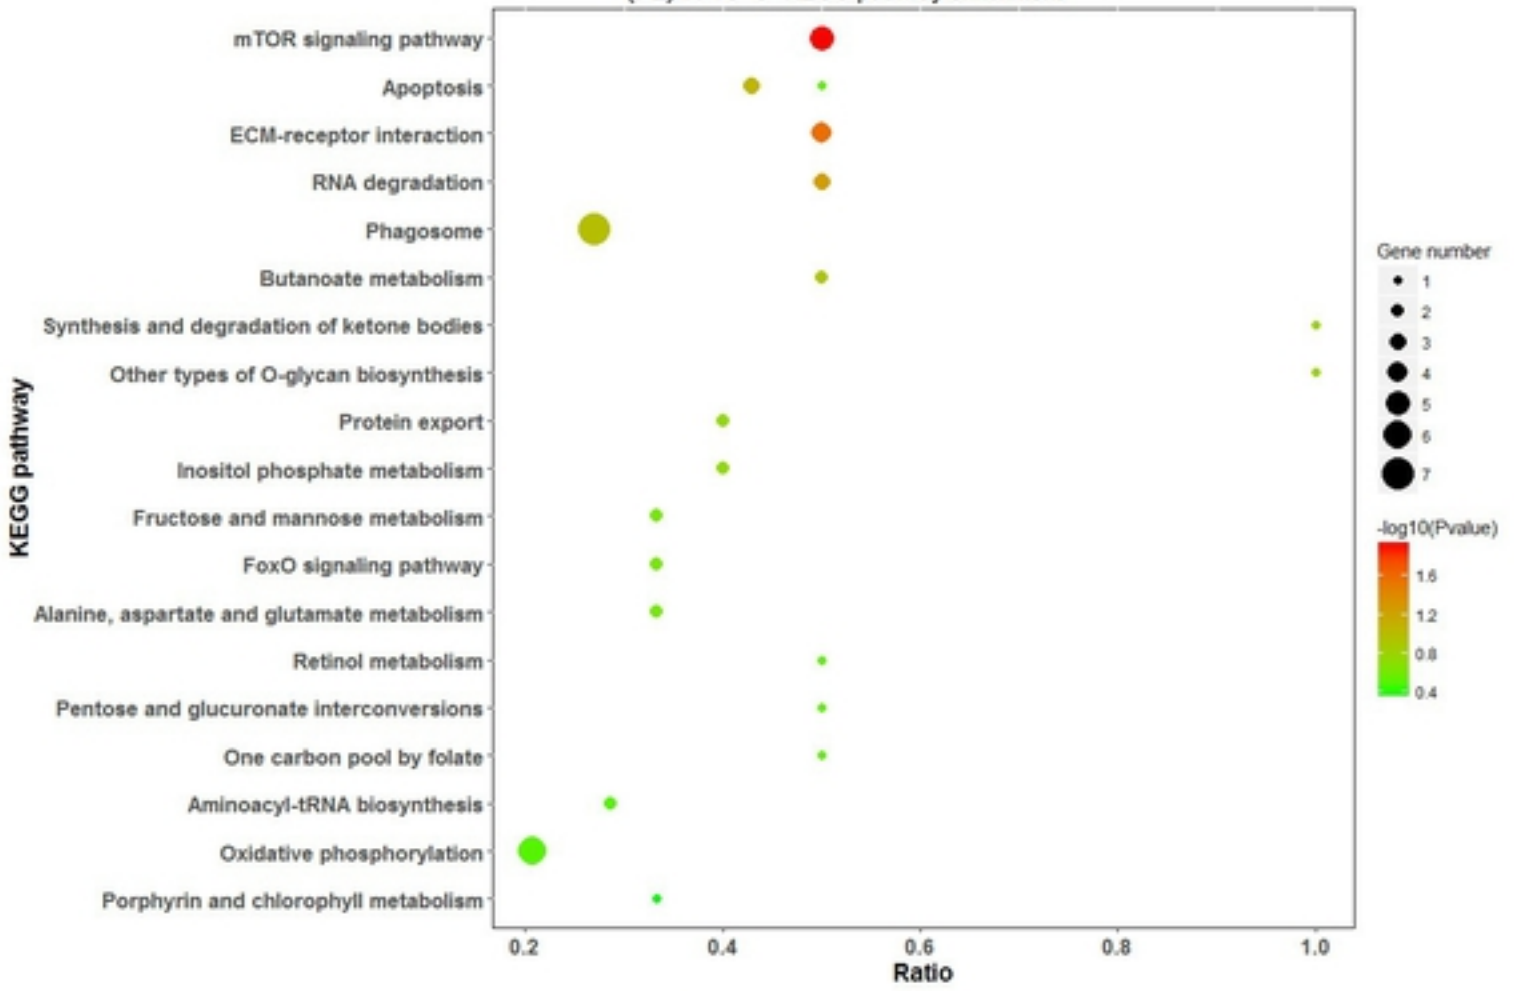

(P2) L-vs-C KEGG pathway enrichment

bioRxiv preprint doi: <https://doi.org/10.1101/546762>; this version posted February 11, 2019. The copyright holder for this preprint (which was not certified by peer review) is the author/funder, who has granted bioRxiv a license to display the preprint in perpetuity. It is made available under aCC-BY 4.0 International license.

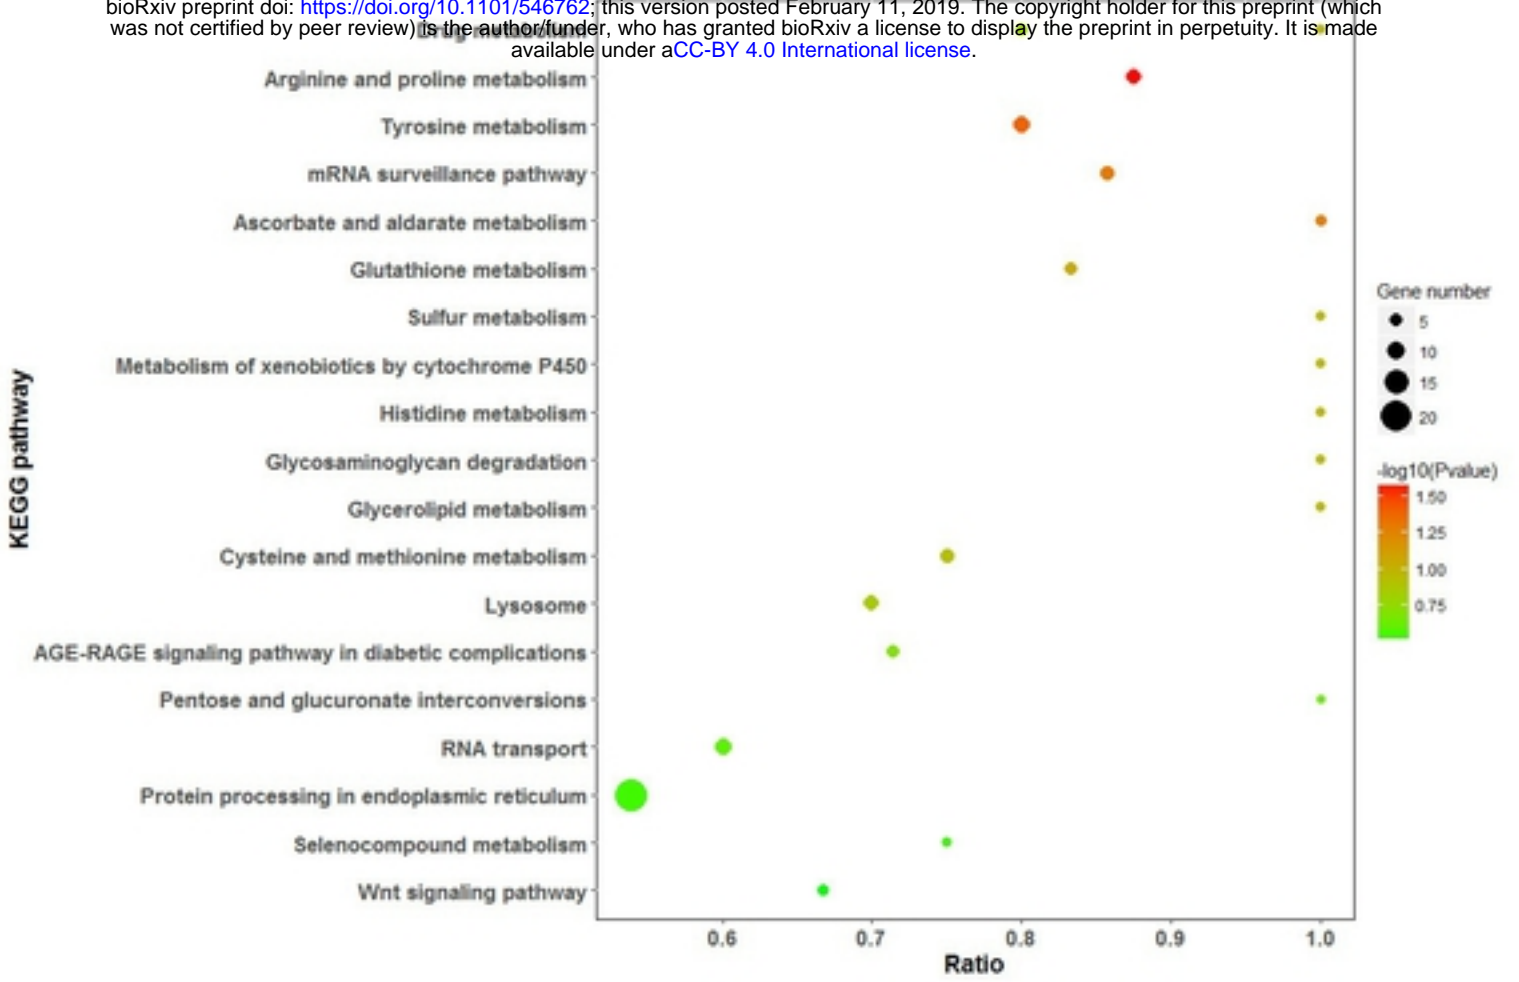

(P3) L-vs-R KEGG pathway enrichment

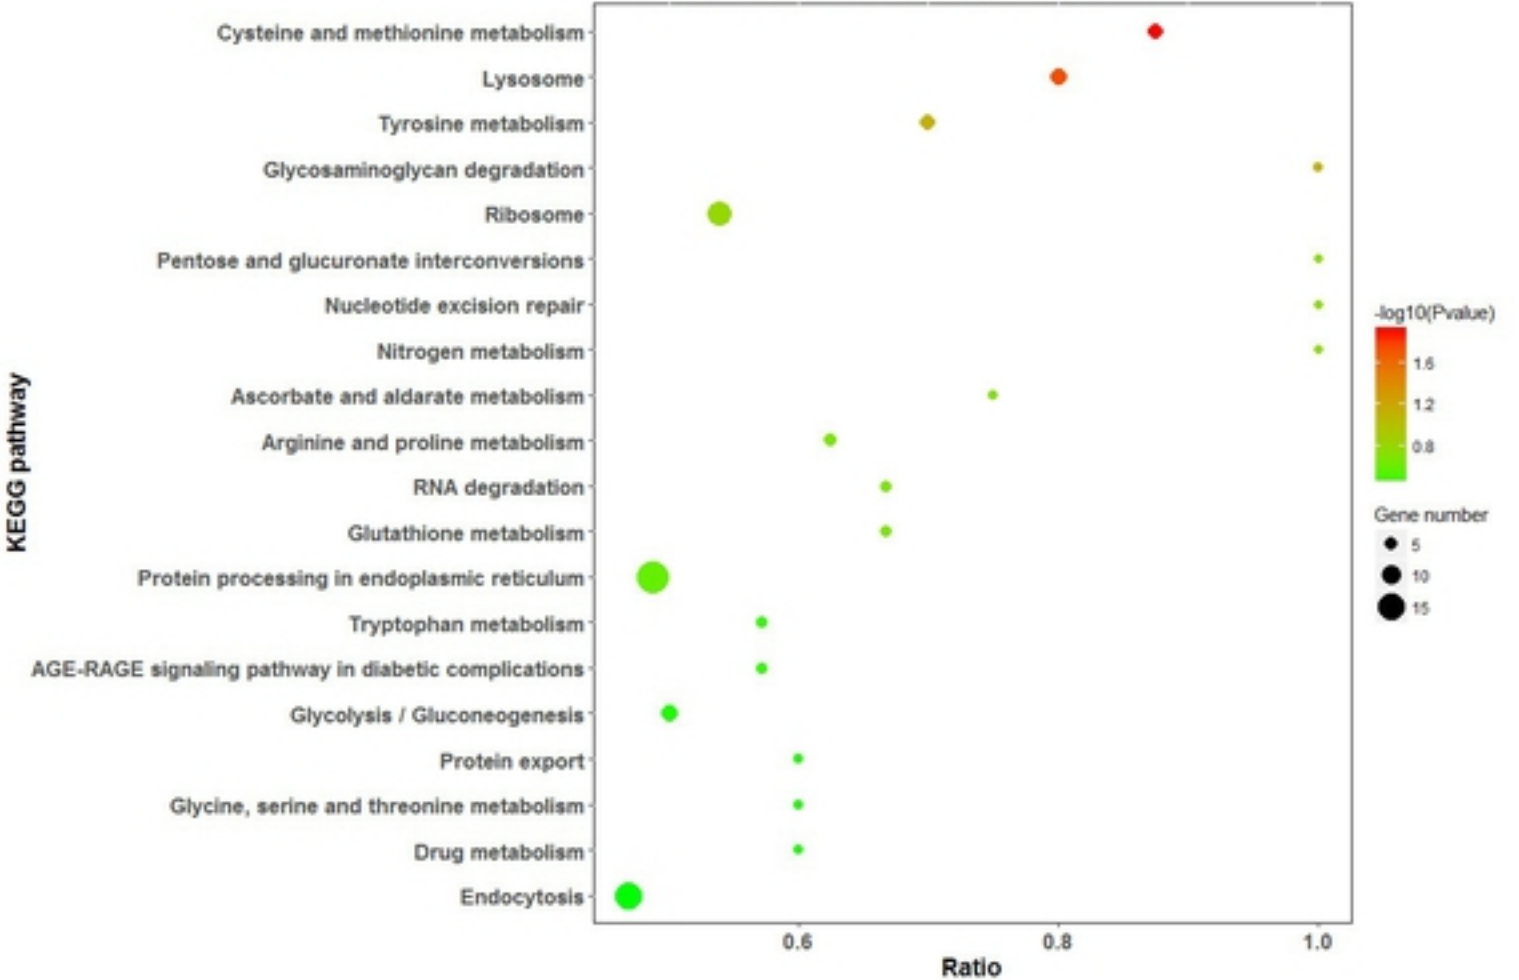

Figure

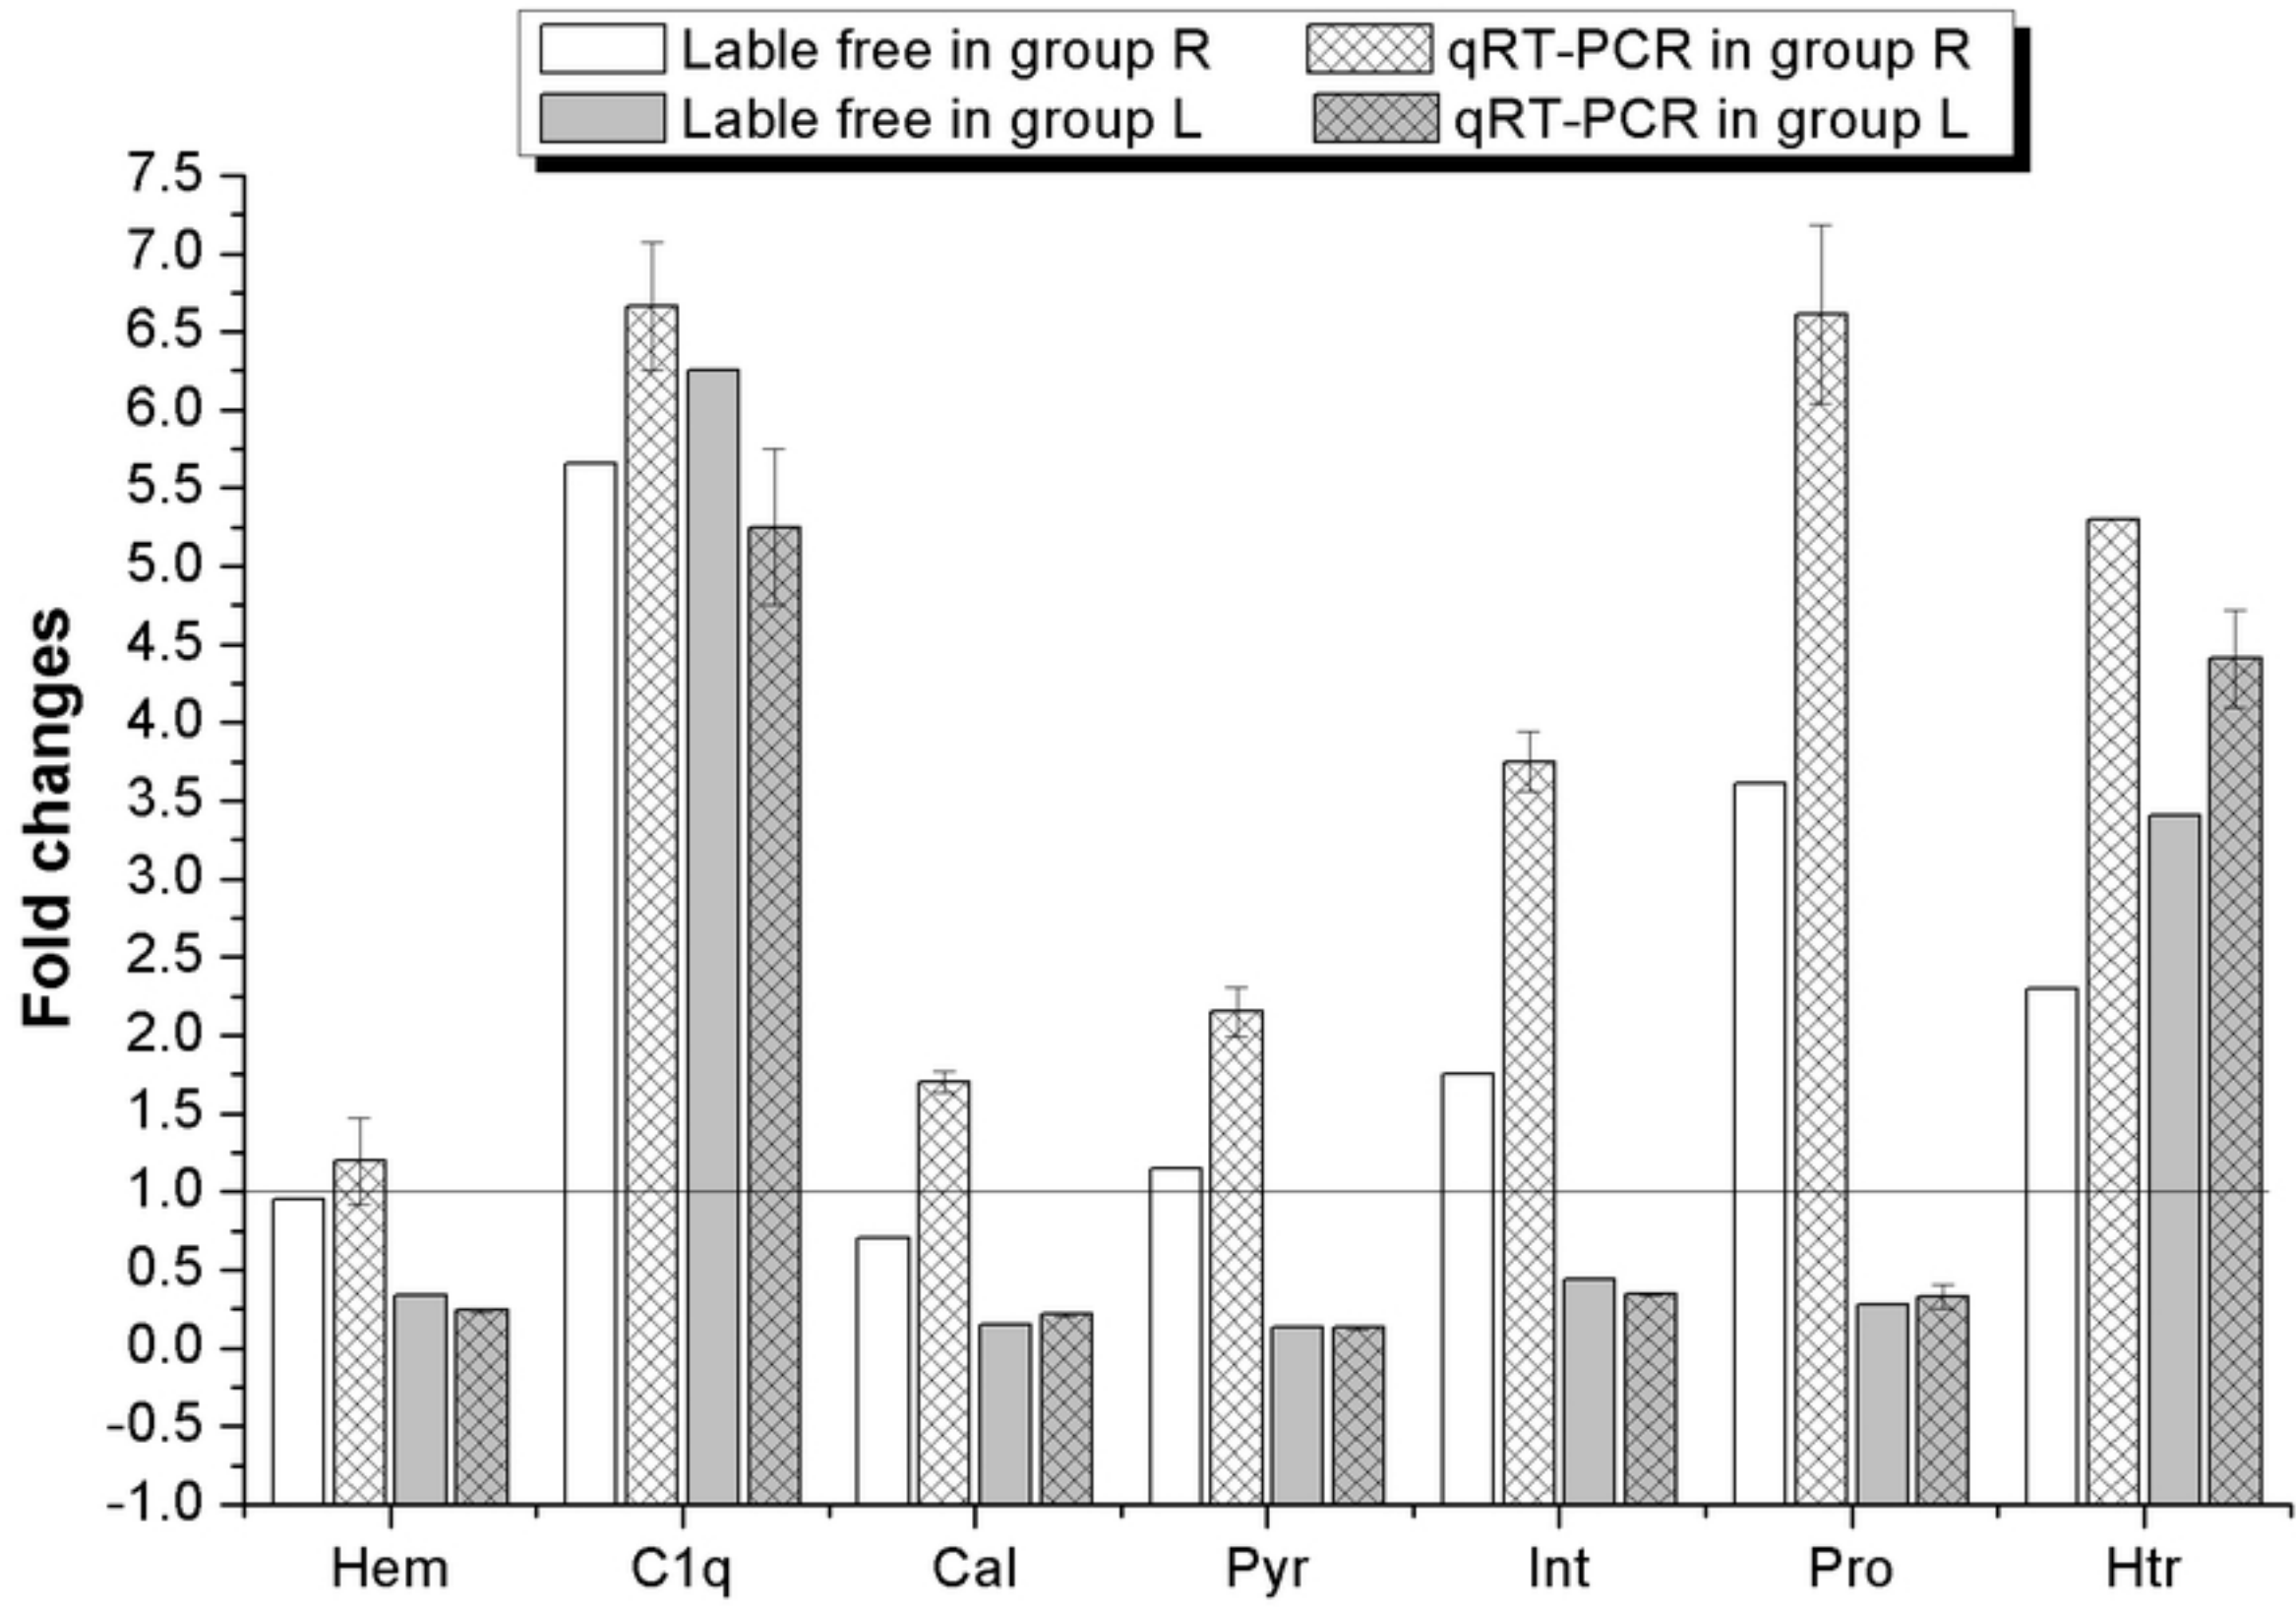

Figure

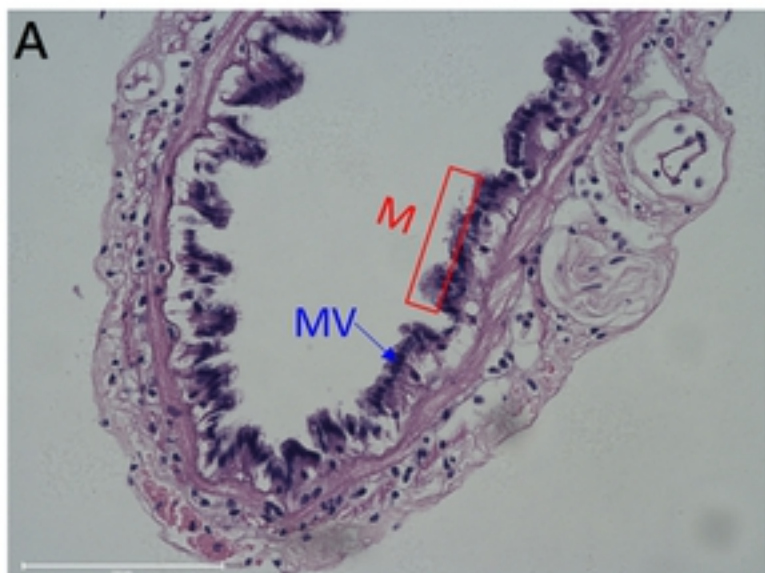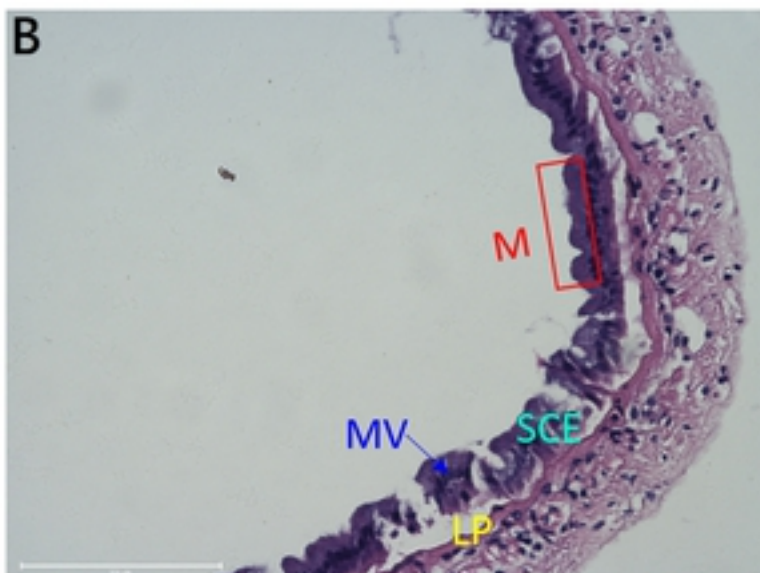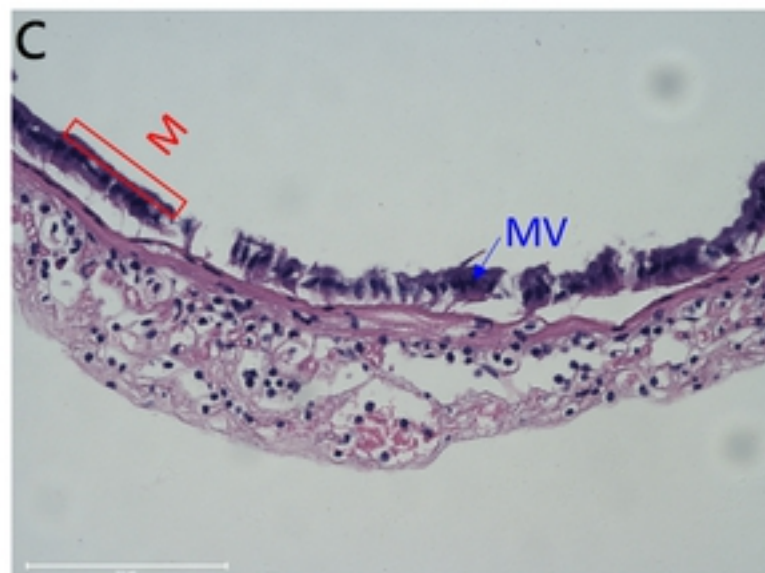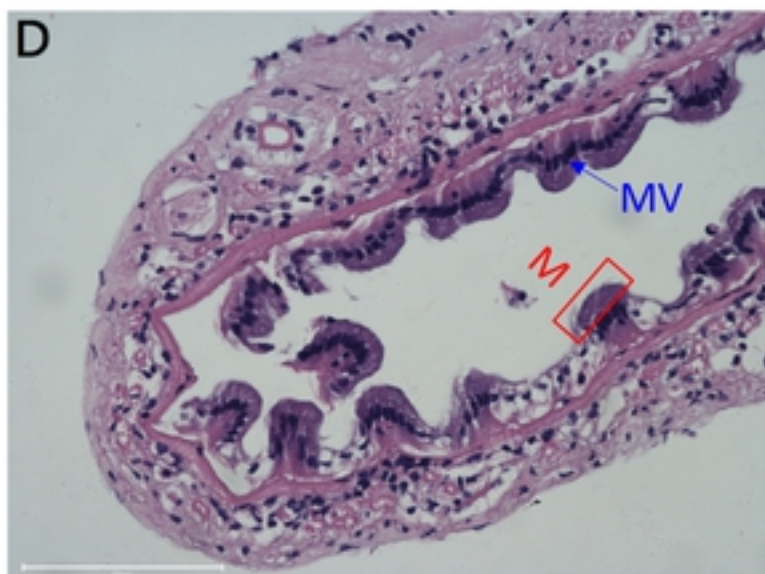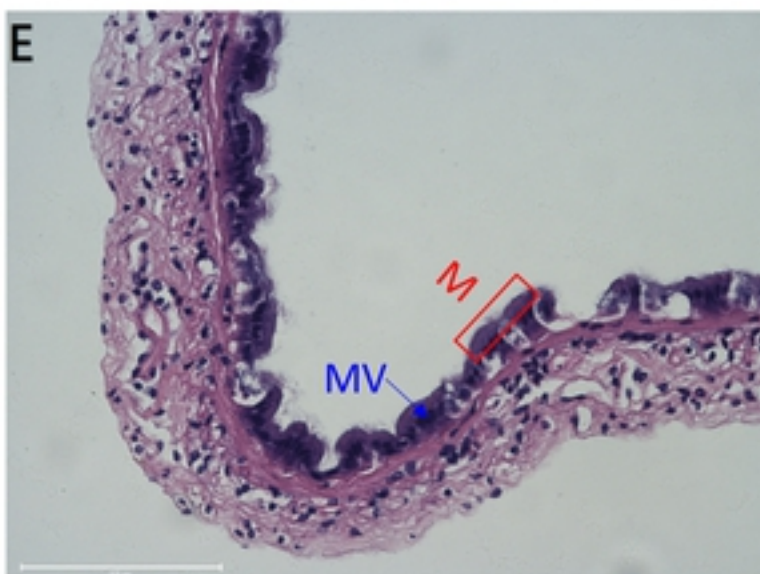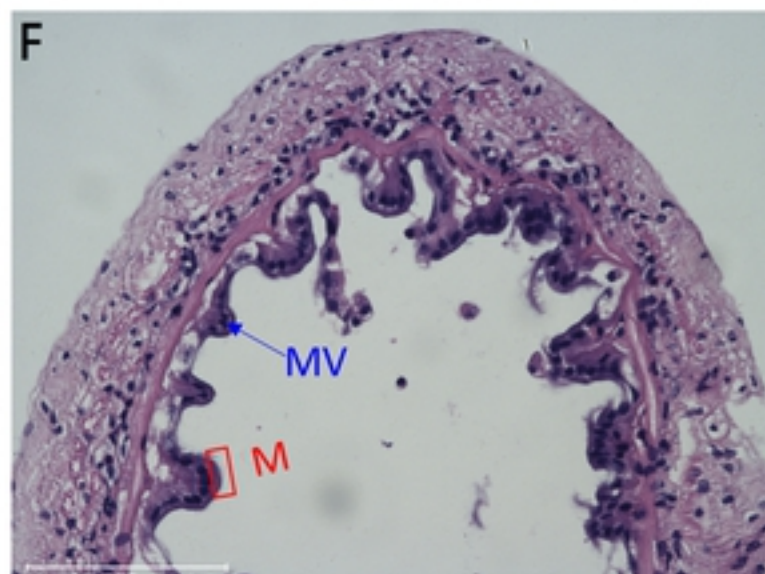

Figure

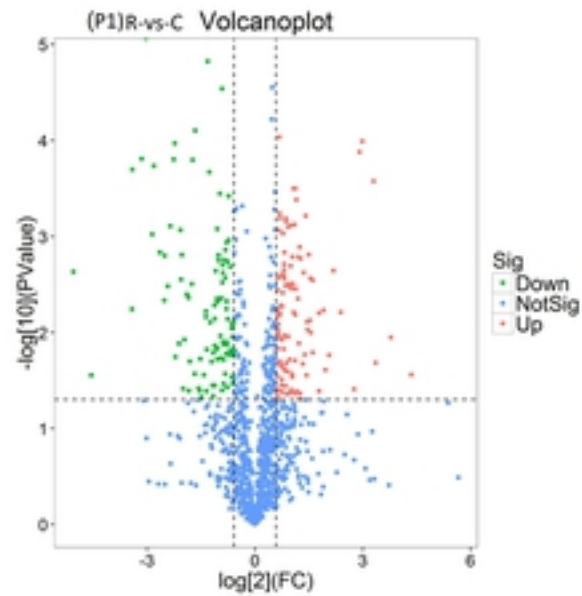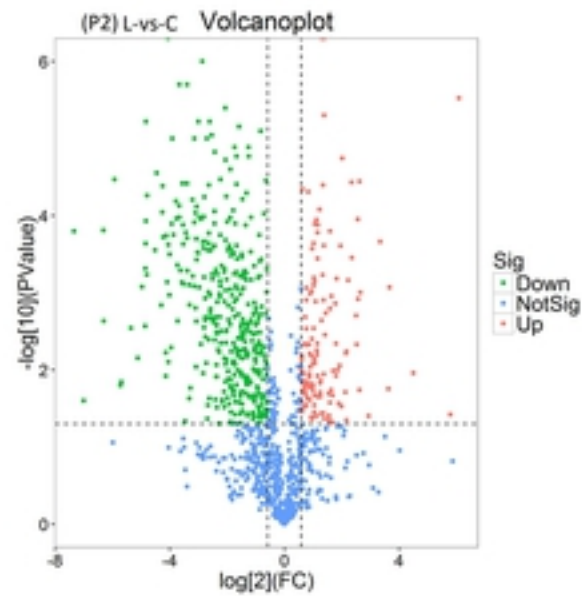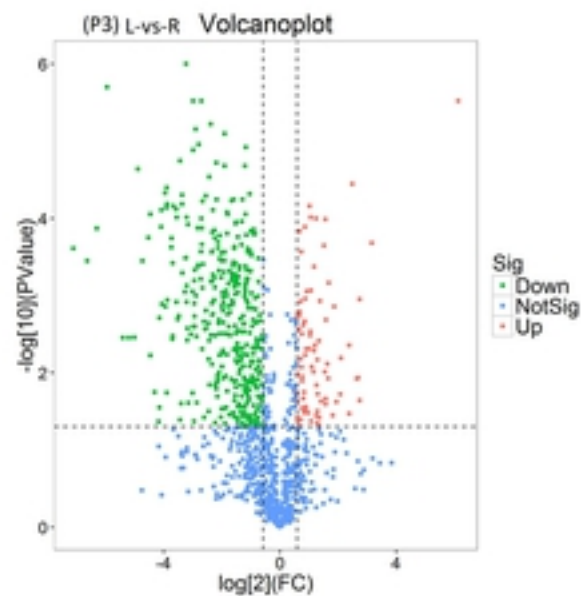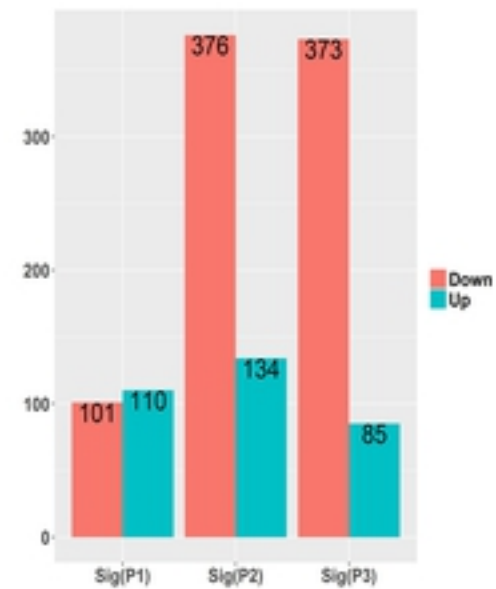

Figure



(P1) GO enrichment analysis R-vs-C

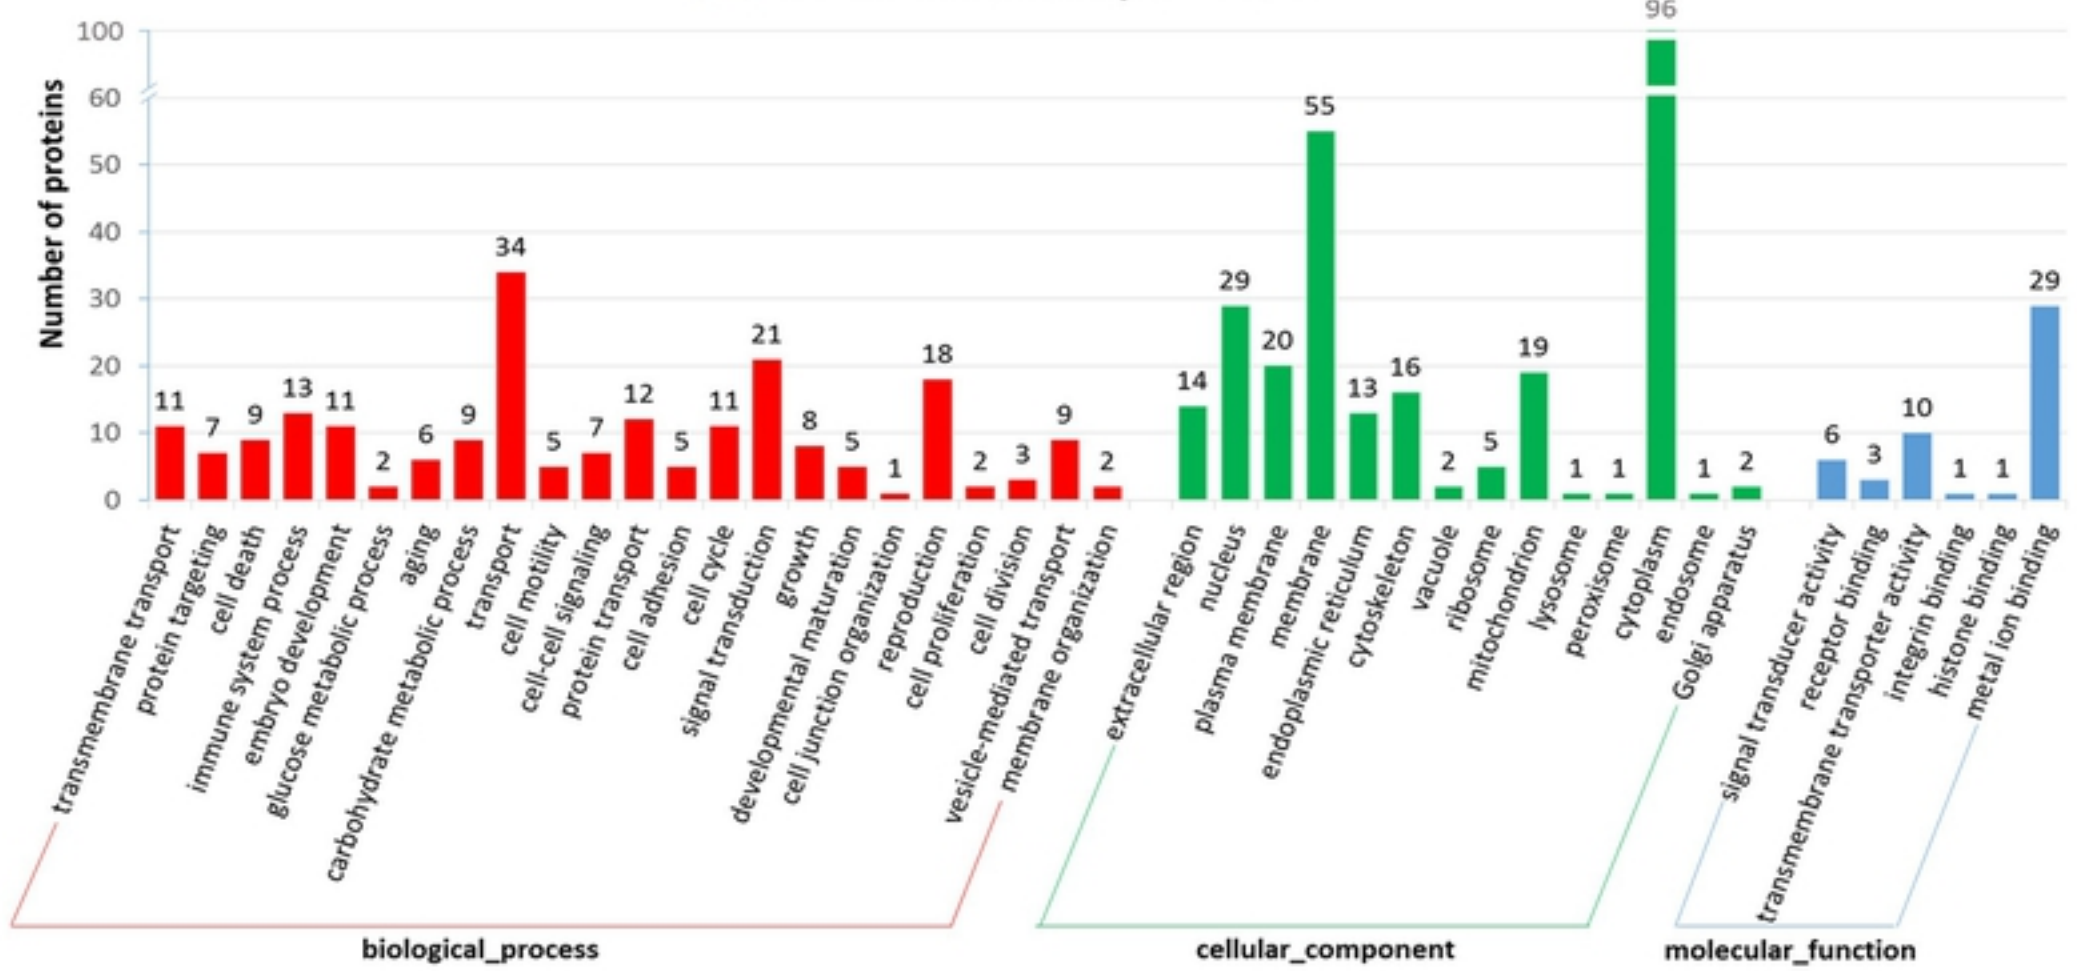

(P2) GO enrichment analysis L-vs-C

bioRxiv preprint doi: <https://doi.org/10.1101/546762>; this version posted February 11, 2019. The copyright holder for this preprint (which was not certified by peer review) is the author/funder, who has granted bioRxiv a license to display the preprint in perpetuity. It is made available under aCC-BY 4.0 International license.

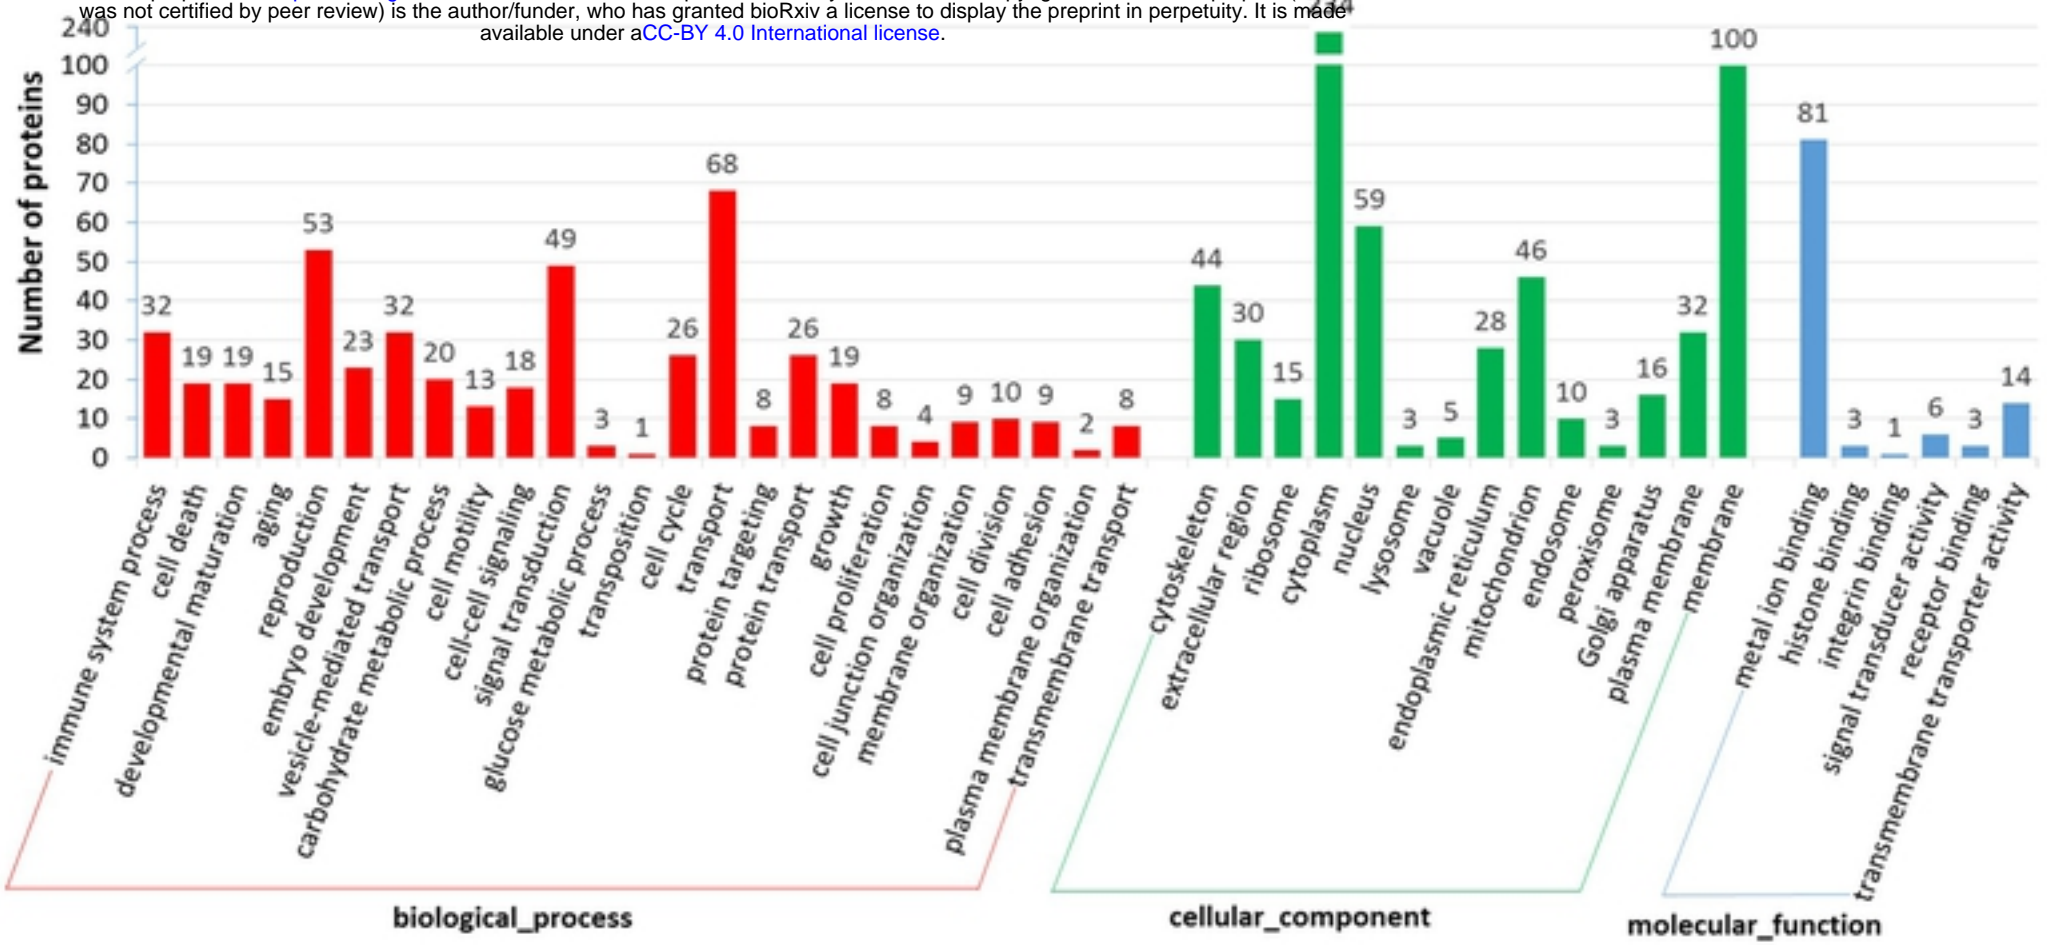

(P3) GO enrichment analysis L-vs-R

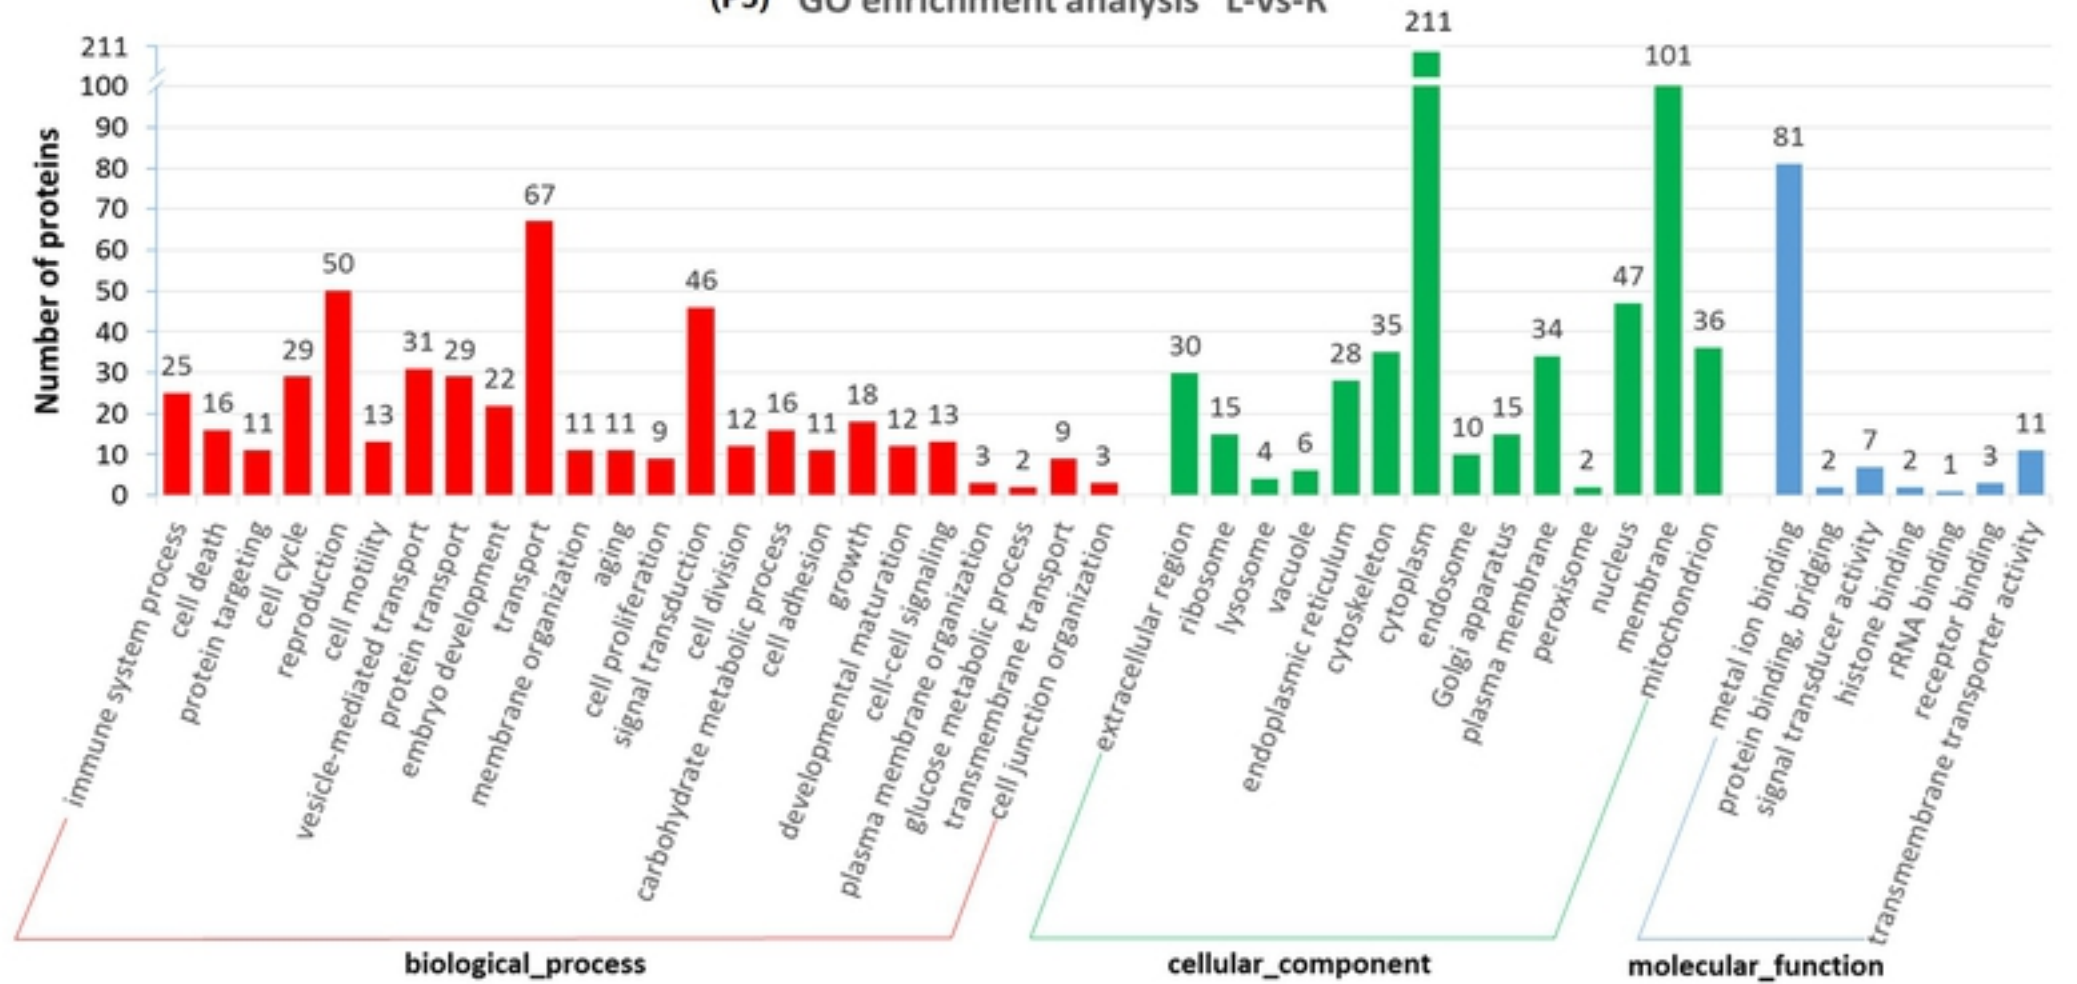

Figure
